# Supplementary material for: Biocatalytic synthesis of non-vicinal aliphatic diols
Source: Royal Society of Chemistry journal article supplement (doi:10.1039/d0ob02086a), 2020-12-10
Supplement: d0ob02086a1.pdf [file d0ob02086a1.pdf]

## Supplementary Information

### Biocatalytic synthesis of non-vicinal aliphatic diols

Ana C. Ebrecht, Jasmin C. Aschenbrenner, Martha S. Smit and Diederik J. Opperman

Department of Biotechnology, University of the Free State, 205 Nelson Mandela Drive, Bloemfontein, 9300, South Africa.

E-mail: opperdj@ufs.ac.za

#### Table of content

Figure S1. SDS-PAGE analysis of heterologous expression of CYP505A30 constructs

Figure S2. SDS-PAGE analysis of purified CYP505A30 and CYP505A30HD

Figure S3. UV-Vis spectra of CYP505A30 titrated with fatty acids

Figure S4. UV-Vis spectra of CYP505A30HD titrated with fatty acids

Figure S5. UV-Vis spectra of CYP505A30 titrated with fatty alcohols

Figure S6. UV-Vis spectra of CYP505A30HD titrated with fatty alcohols

Figure S7. UV-Vis spectra of CYP505A30 titrated with *n*-alkanes

Figure S8. UV-Vis spectra of CYP505A30HD titrated with *n*-alkanes

Figure S9. Kinetic characterization of CYP505A30 with fatty acids

Figure S10. Kinetic characterization of CYP505A30 with fatty alcohols

Table S1. Spectral and kinetic parameters for CYP505A30

Table S2. TTN and TOF for CFE biotransformations

Table S3. GC-FID and GC-MS methods

Figure S11. GC and GC-MS chromatograms plus spectra of fatty acids data

Figure S12. GC and GC-MS chromatograms plus spectra of primary fatty alcohols data

Figure S13. GC and GC-MS chromatograms plus spectra of *n*-octanol data

Figure S14. GC and GC-MS chromatograms plus spectra of 2-decanol and 2-dodecanol data

Scheme S1. Sequential regioselective oxyfunctionalization of *n*-octane by CYP505A30 in the production of diols.

Scheme S2. Sequential regioselective oxyfunctionalization of *n*-decane by CYP505A30 in the production of diols.

Figure S15. GC and GC-MS chromatograms plus spectra of alkane data

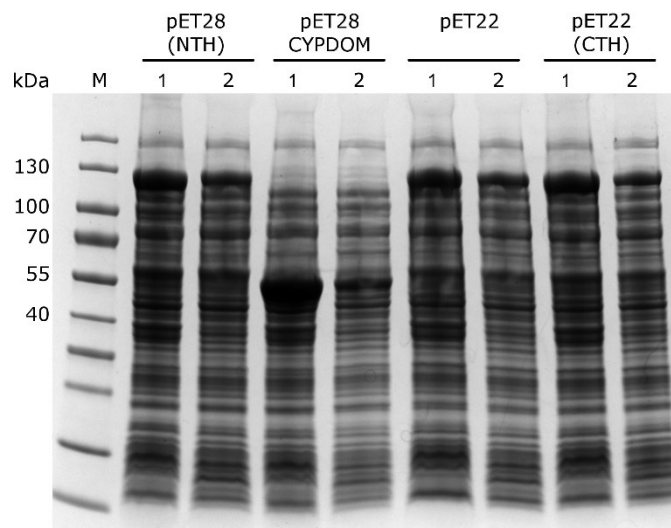

Figure S1. SDS-PAGE analysis of heterologous expression of CYP505A30 constructs. Lane M: molecular weight marker, lanes 1: total protein fraction, lanes 2: soluble protein fractions.

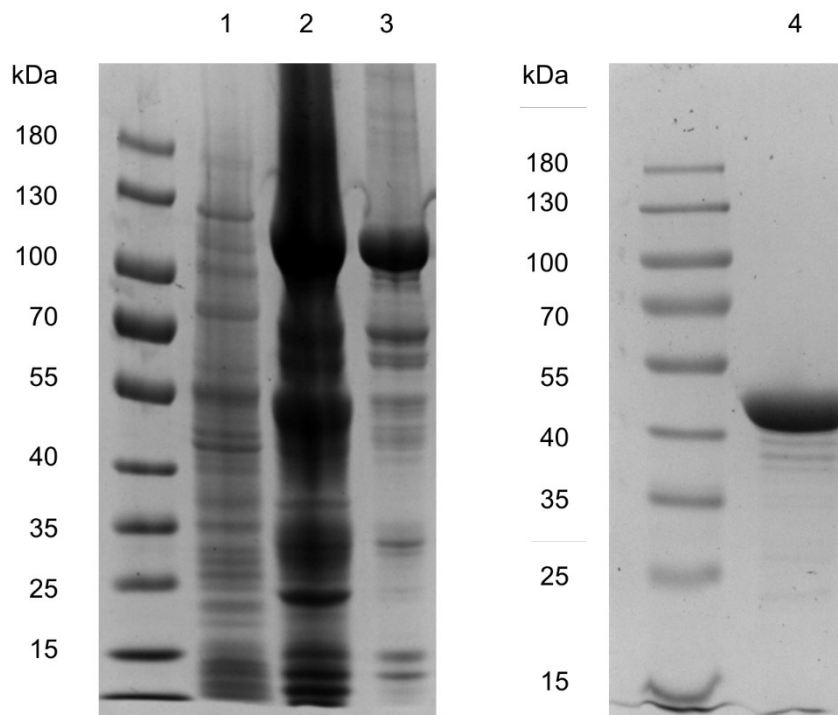

Figure S2. SDS-PAGE analysis of purified CYP505A30 and CYP505A30HD. Lane 1: crude extract containing CYP505A30, lane 2: pooled IMAC fractions of CYP505A30, lane 3: purified CYP505A30 after anion exchange chromatography, lane 4: purified heme domain.

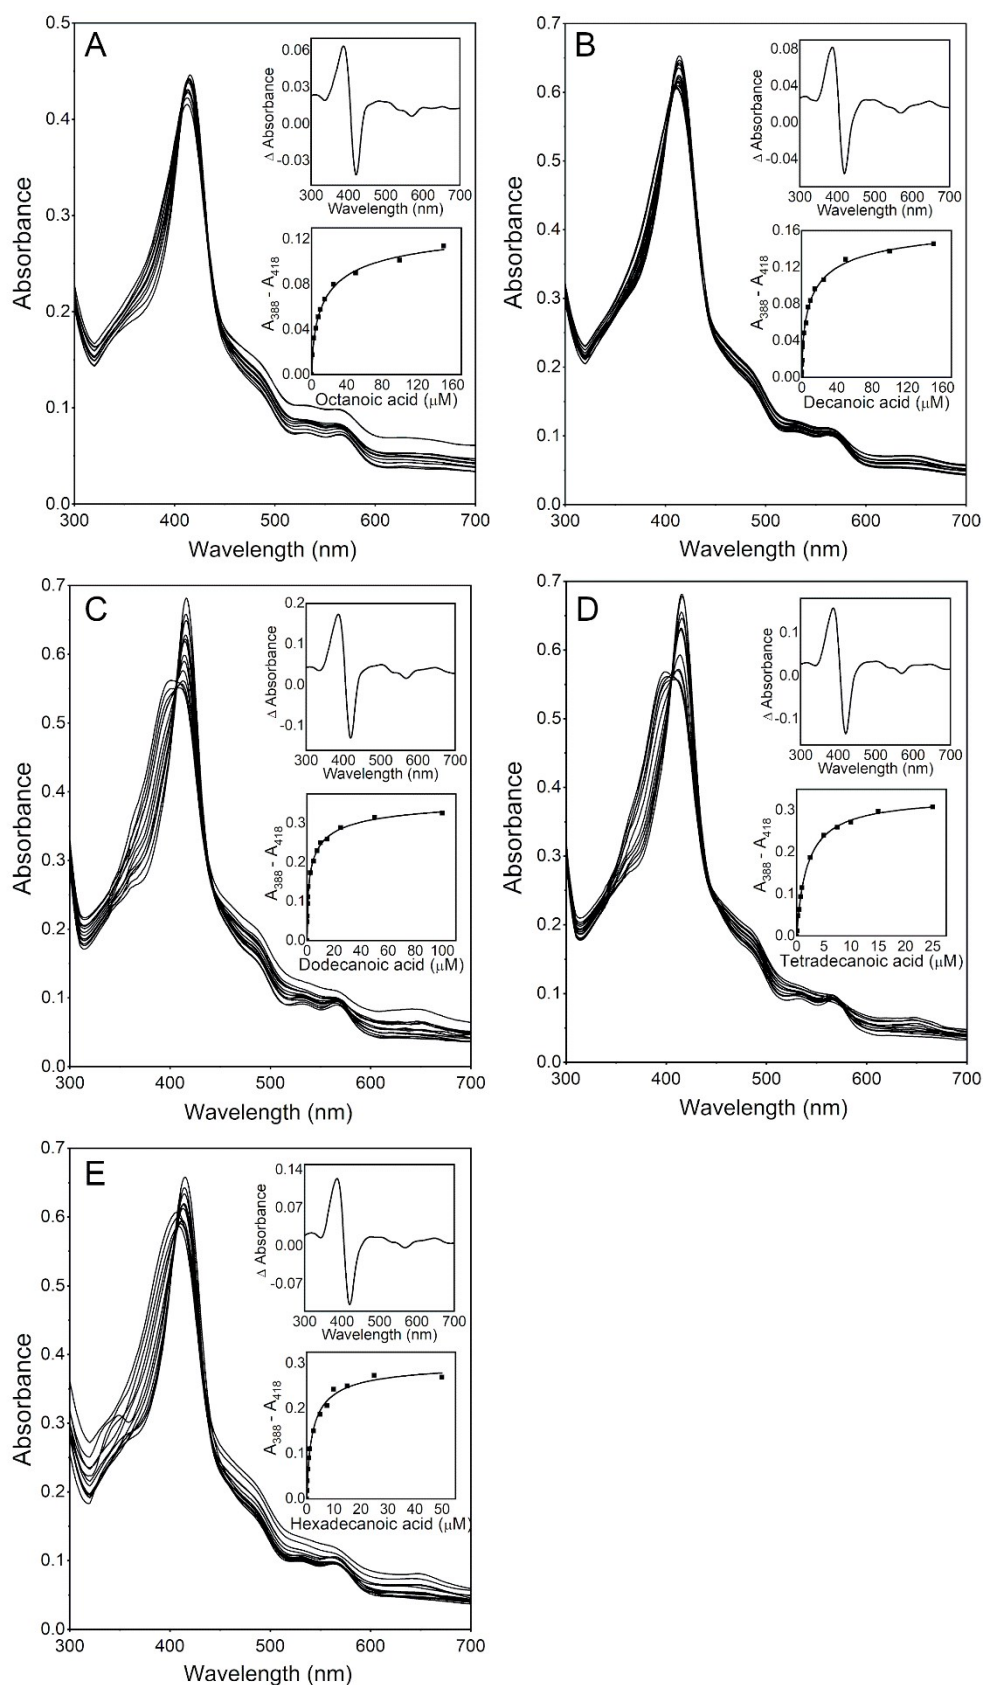

Figure S3. UV-Vis spectra of CYP505A30 titrated with fatty acids. A) octanoic acid B) decanoic acid C) dodecanoic acid D) tetradecanoic acid E) hexadecanoic acid. Inset top: Difference spectra. Inset bottom: Dissociation constant ( $K_D$ ) analysis.

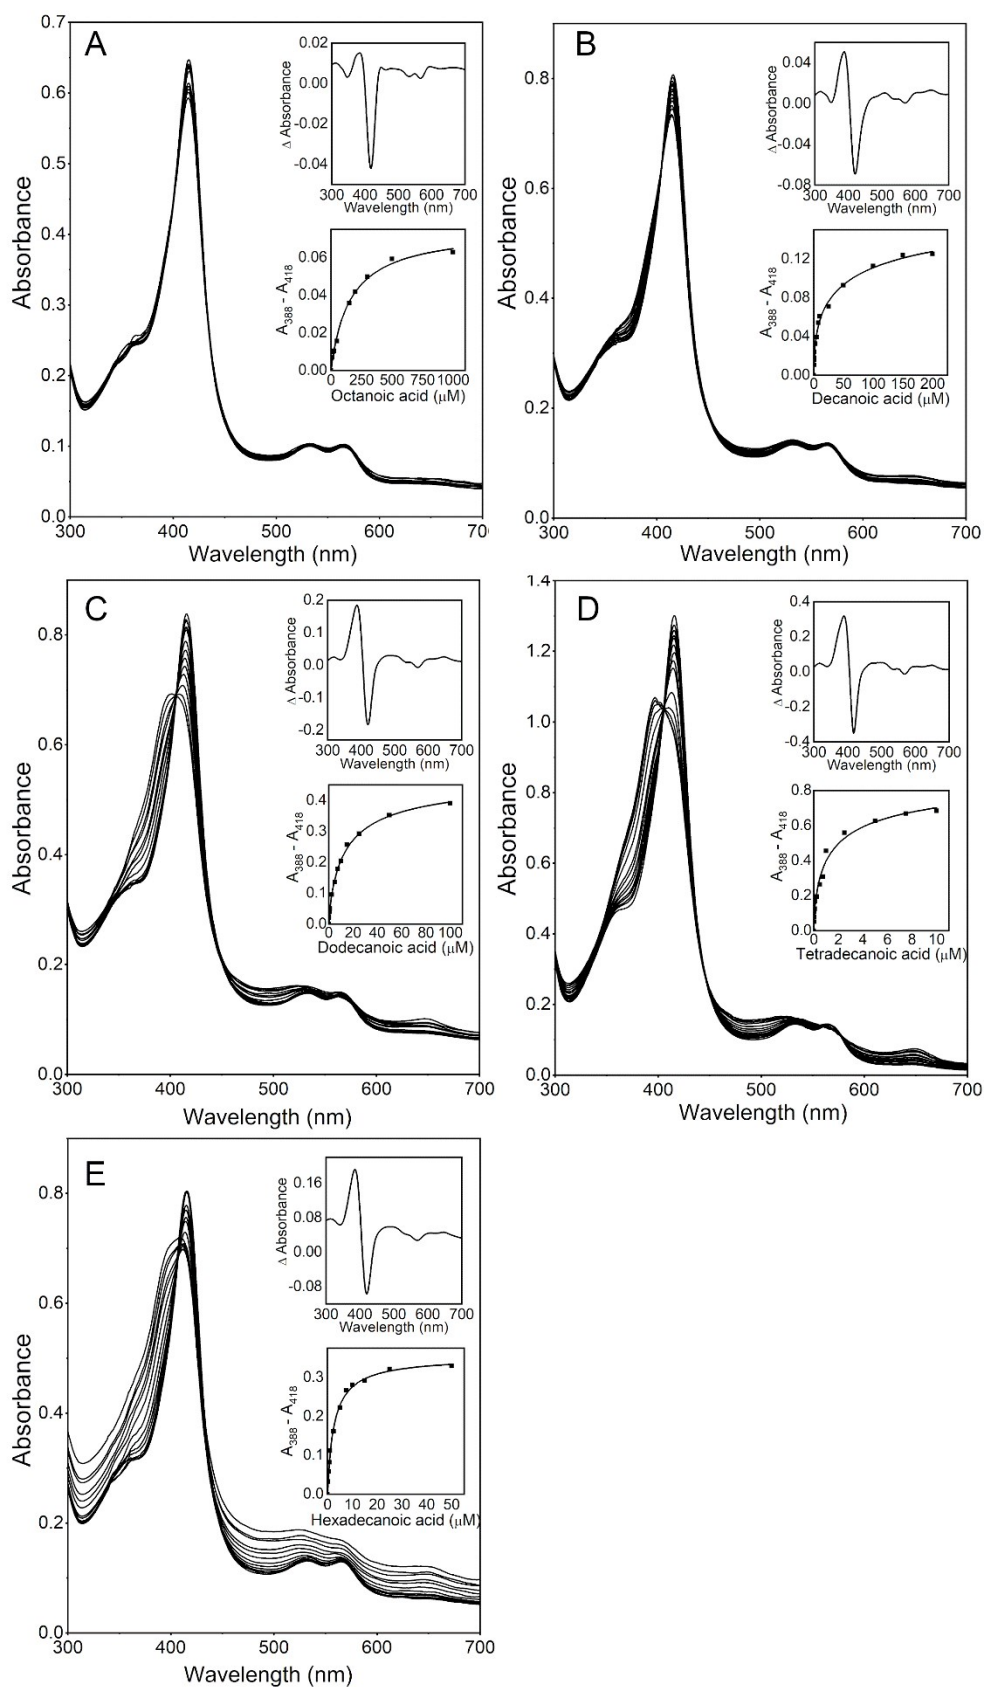

Figure S4. UV-Vis spectra of CYP505A30HD titrated with fatty acids. A) octanoic acid B) decanoic acid C) dodecanoic acid D) tetradecanoic acid E) hexadecanoic acid. Inset top: Difference spectra. Inset bottom: Dissociation constant ( $K_D$ ) analysis.

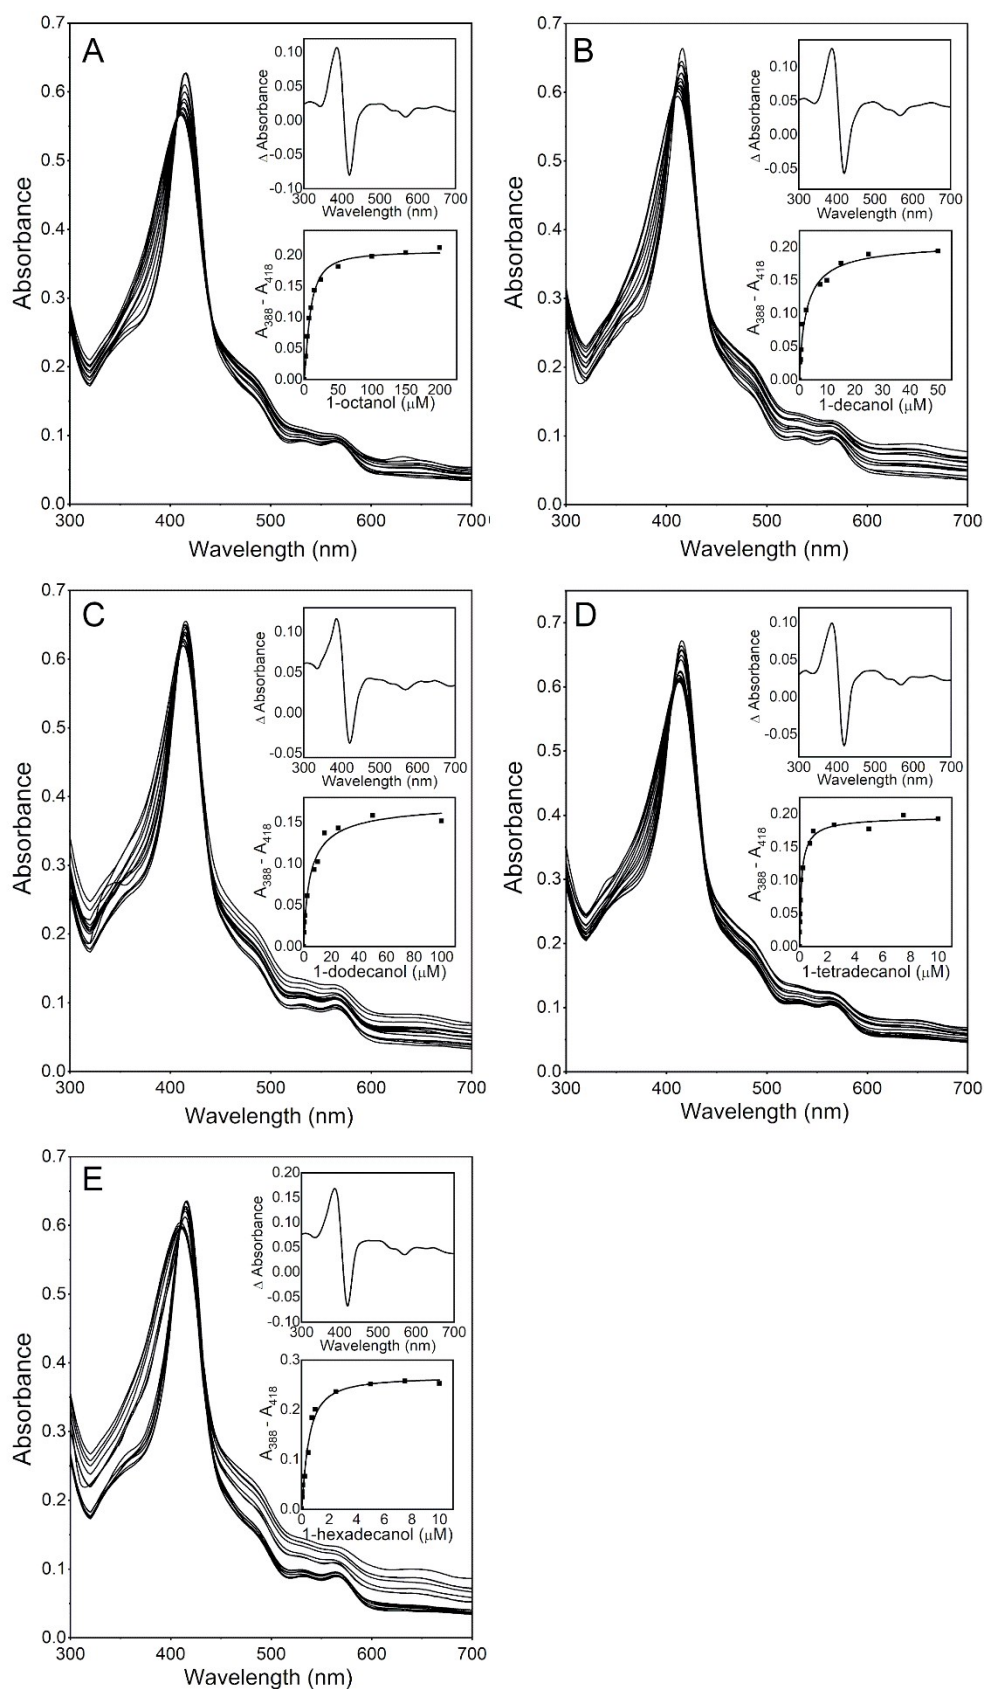

Figure S5. UV-Vis spectra of CYP505A30 titrated with fatty alcohols. A) 1-octanol B) 1-decanol C) 1-dodecanol D) 1-tetradecanol E) 1-hexadecanol. Inset top: Difference spectra. Inset bottom: Dissociation constant ( $K_D$ ) analysis.

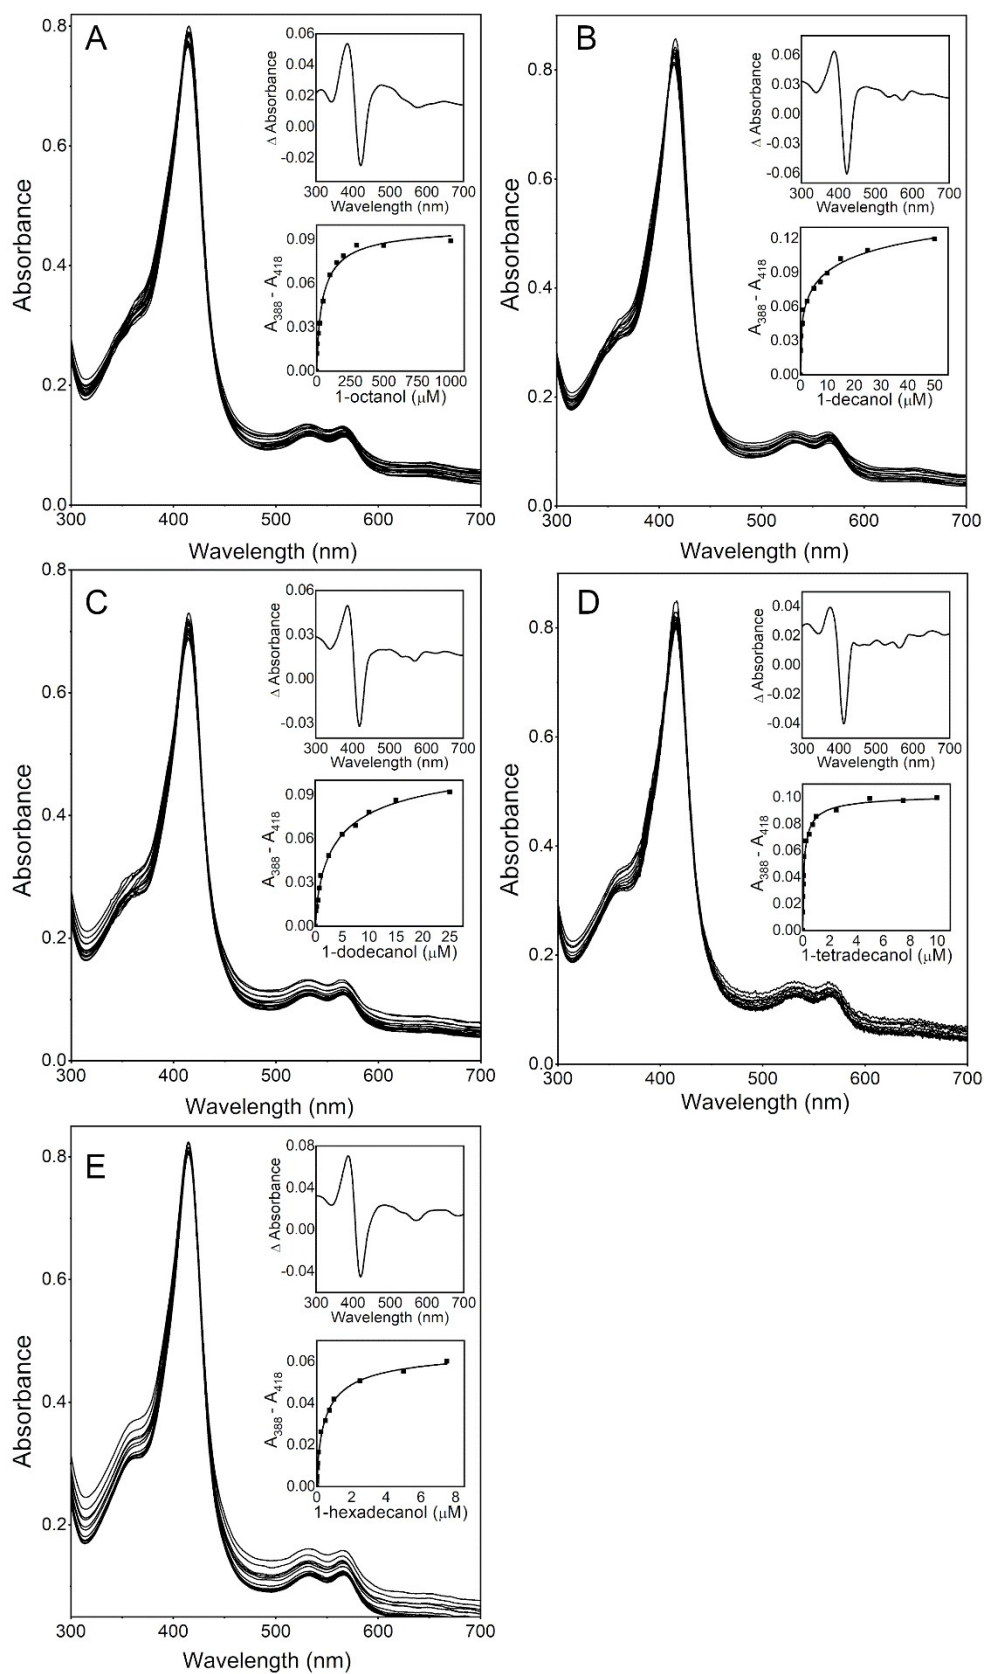

Figure S6. UV-Vis spectra of CYP505A30HD titrated with fatty alcohols. A) 1-octanol B) 1-decanol C) 1-dodecanol D) 1-tetradecanol E) 1-hexadecanol. Inset top: Difference spectra. Inset bottom: Dissociation constant ( $K_D$ ) analysis.



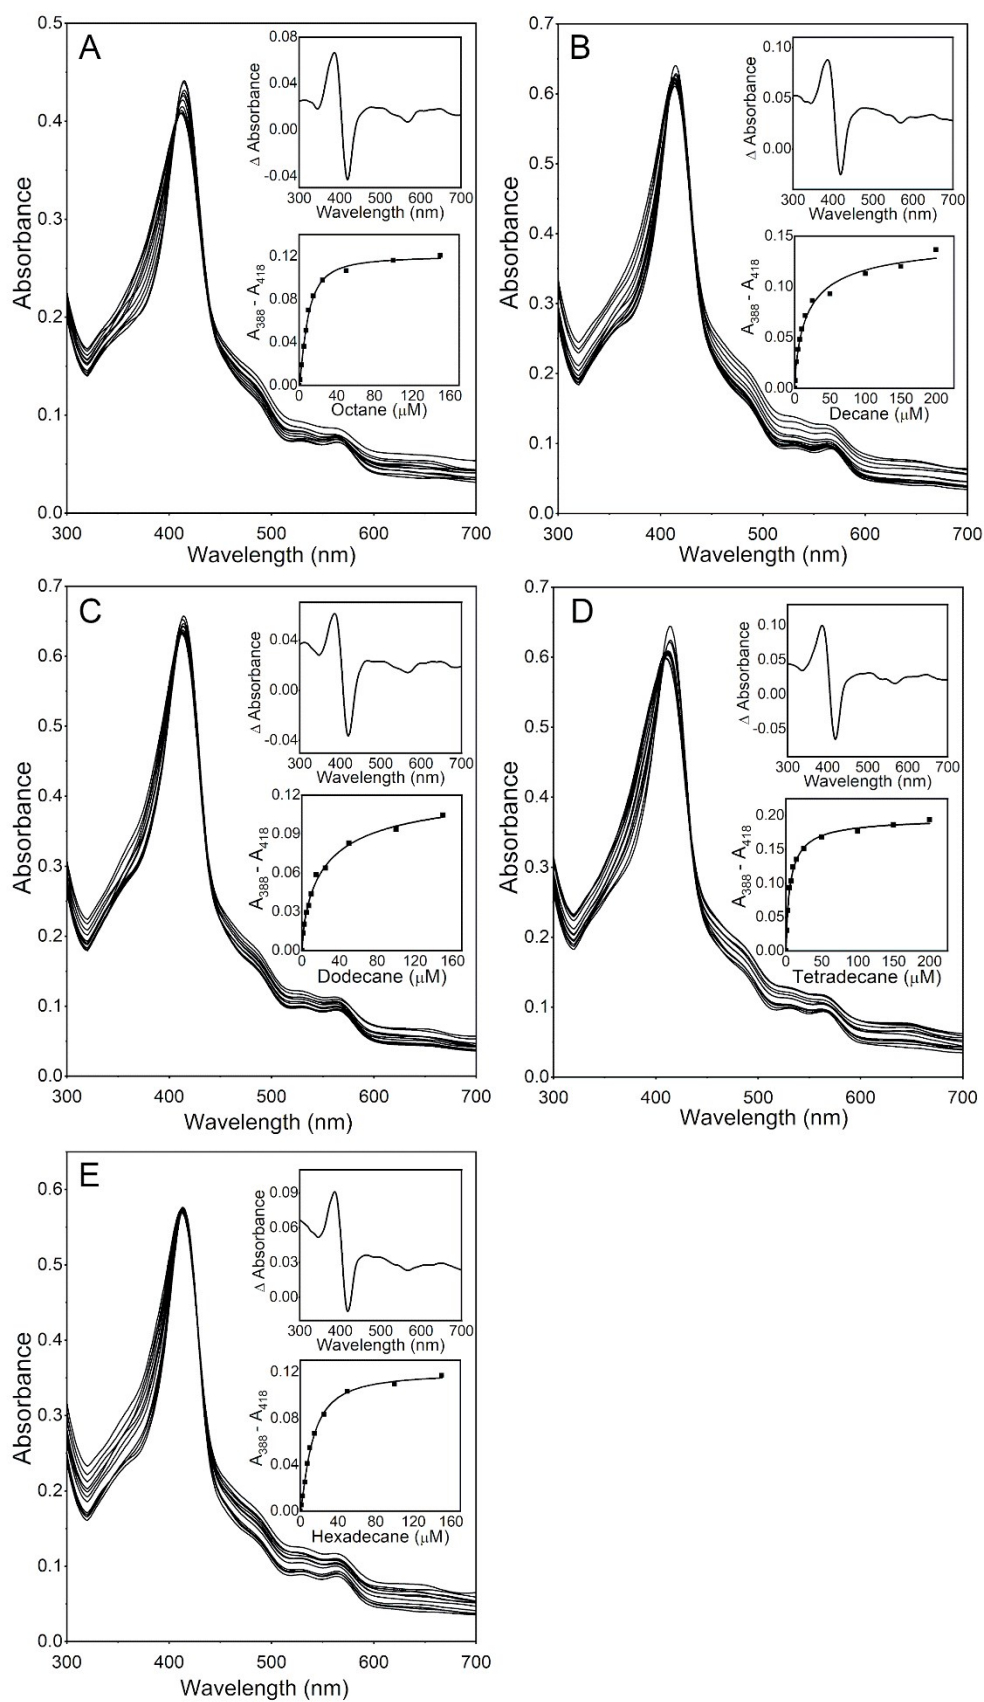

Figure S7. UV-Vis spectra of CYP505A30 titrated with *n*-alkanes. A) *n*-octane B) *n*-decane C) *n*-dodecane D) *n*-tetradecane E) *n*-hexadecane. Inset top: Difference spectra. Inset bottom: Dissociation constant ( $K_D$ ) analysis.

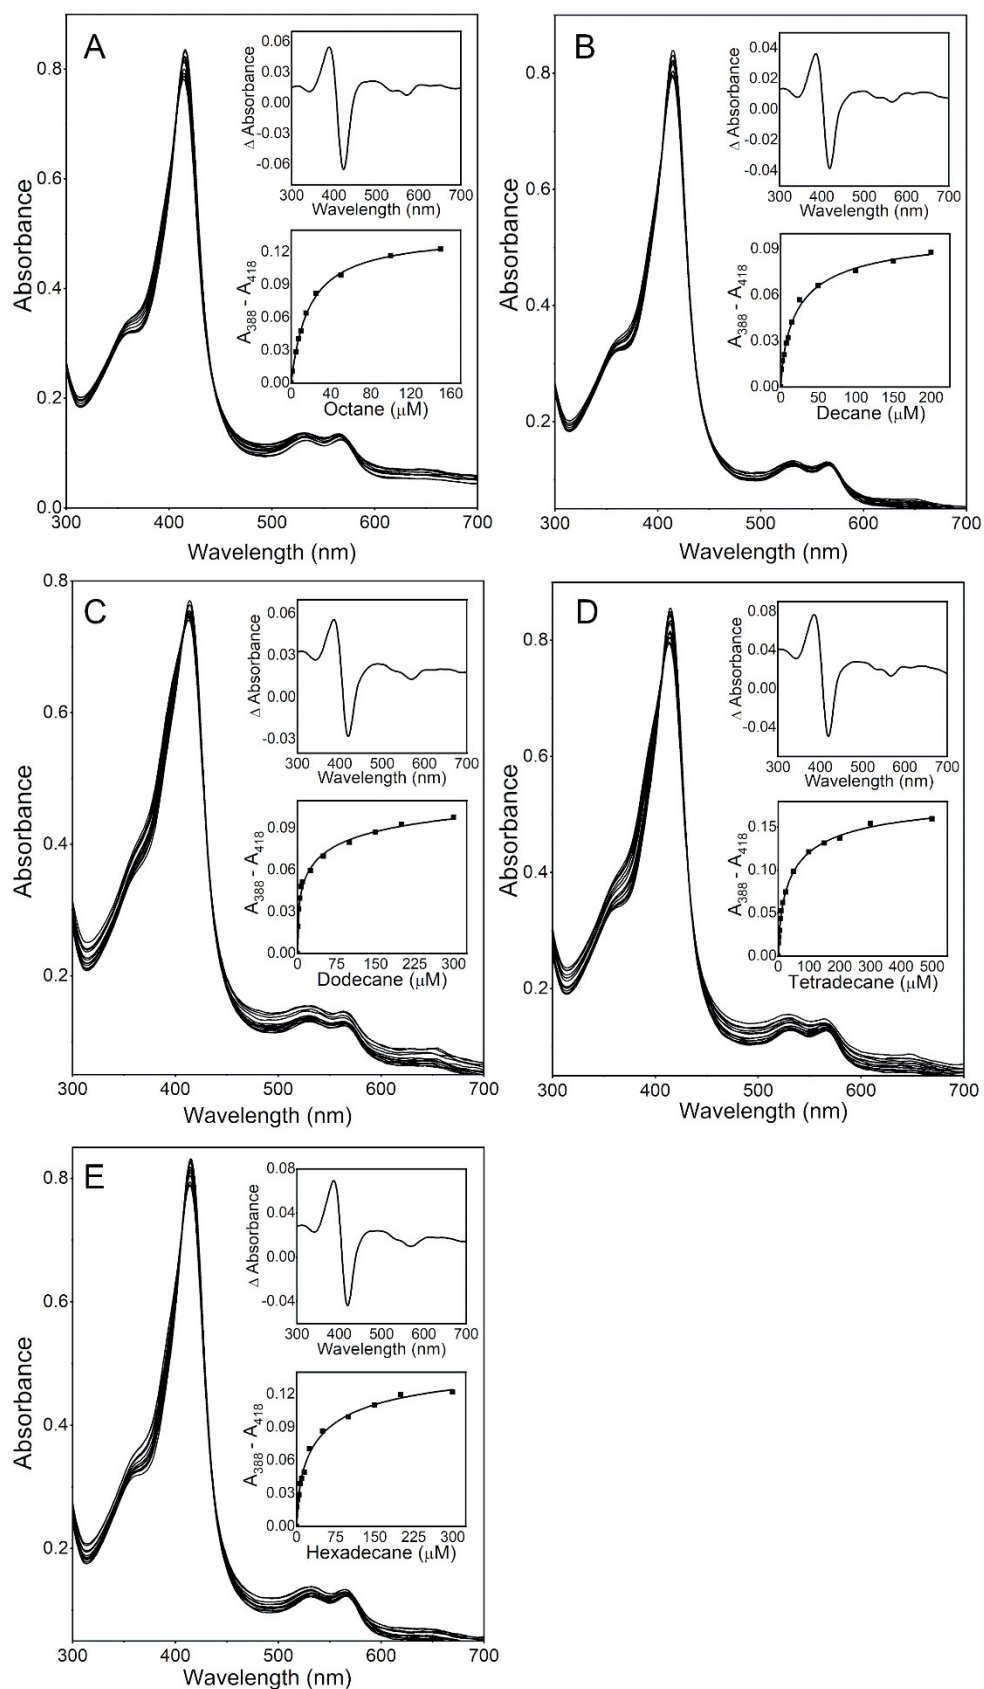

Figure S8. UV-Vis spectra of CYP505A30HD titrated with *n*-alkanes. A) *n*-octane B) *n*-decane C) *n*-dodecane D) *n*-tetradecane E) *n*-hexadecane. Inset top: Difference spectra. Inset bottom: Dissociation constant ( $K_D$ ) analysis.



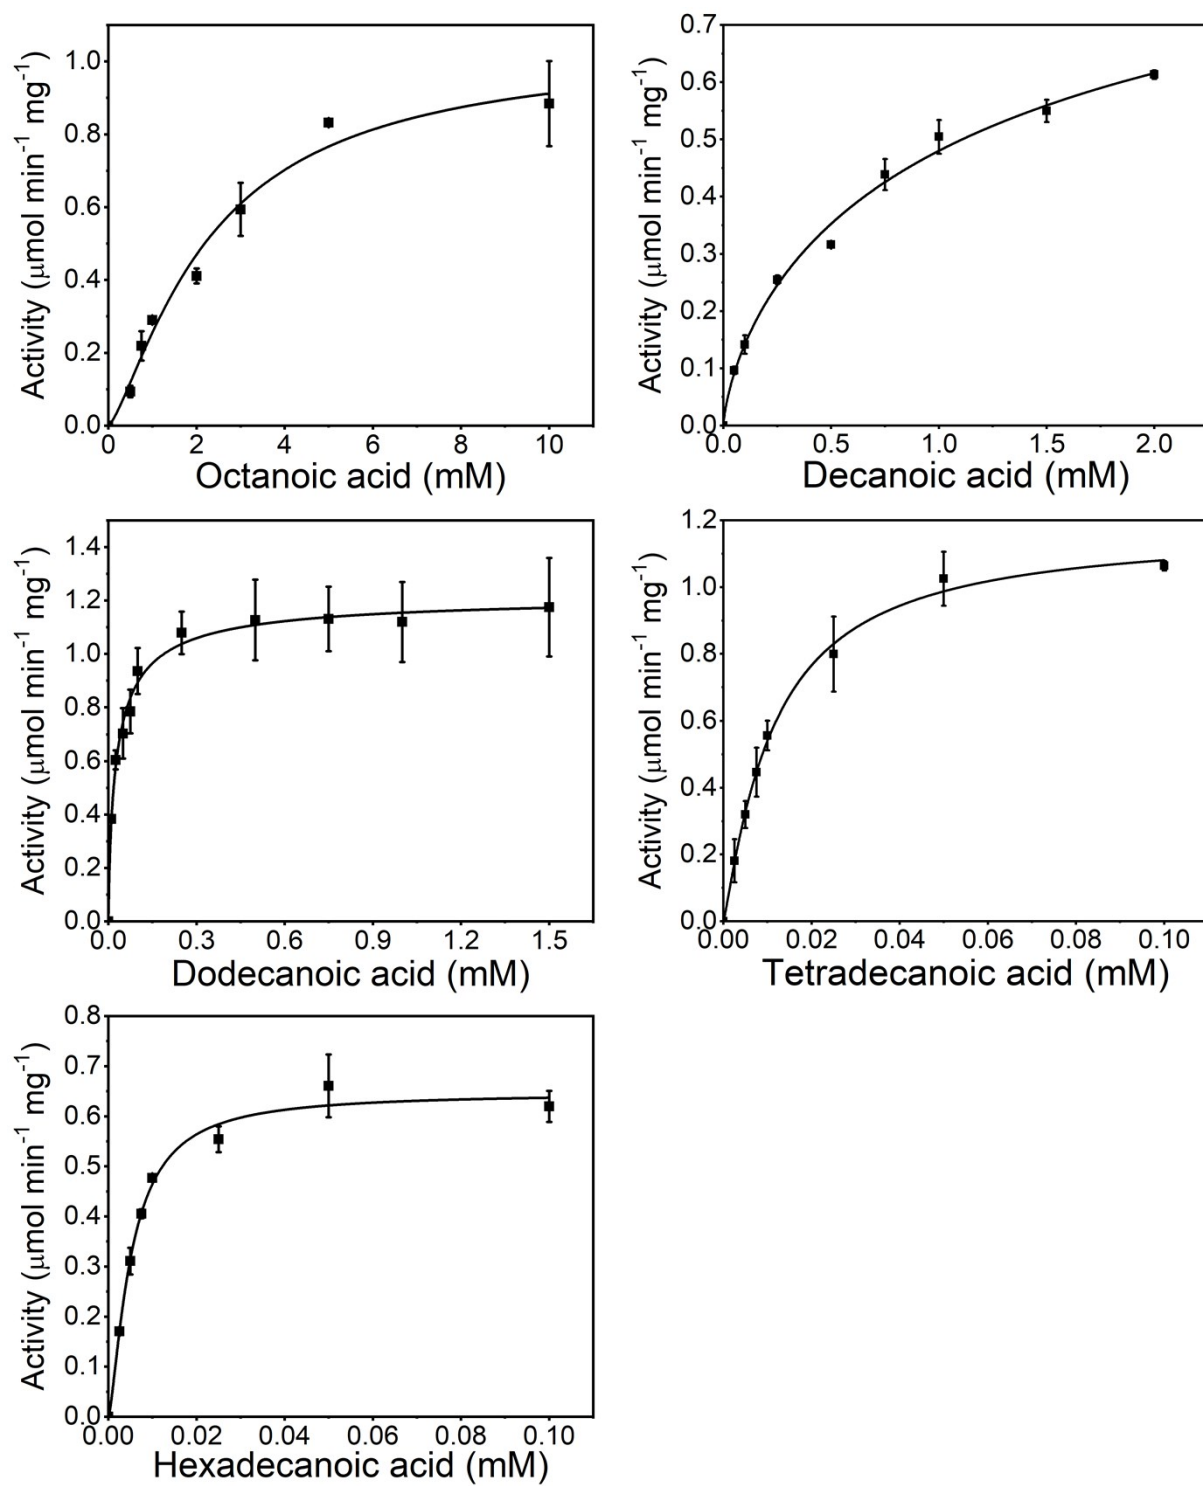

Figure S9. Kinetic characterization of CYP505A30 with fatty acids

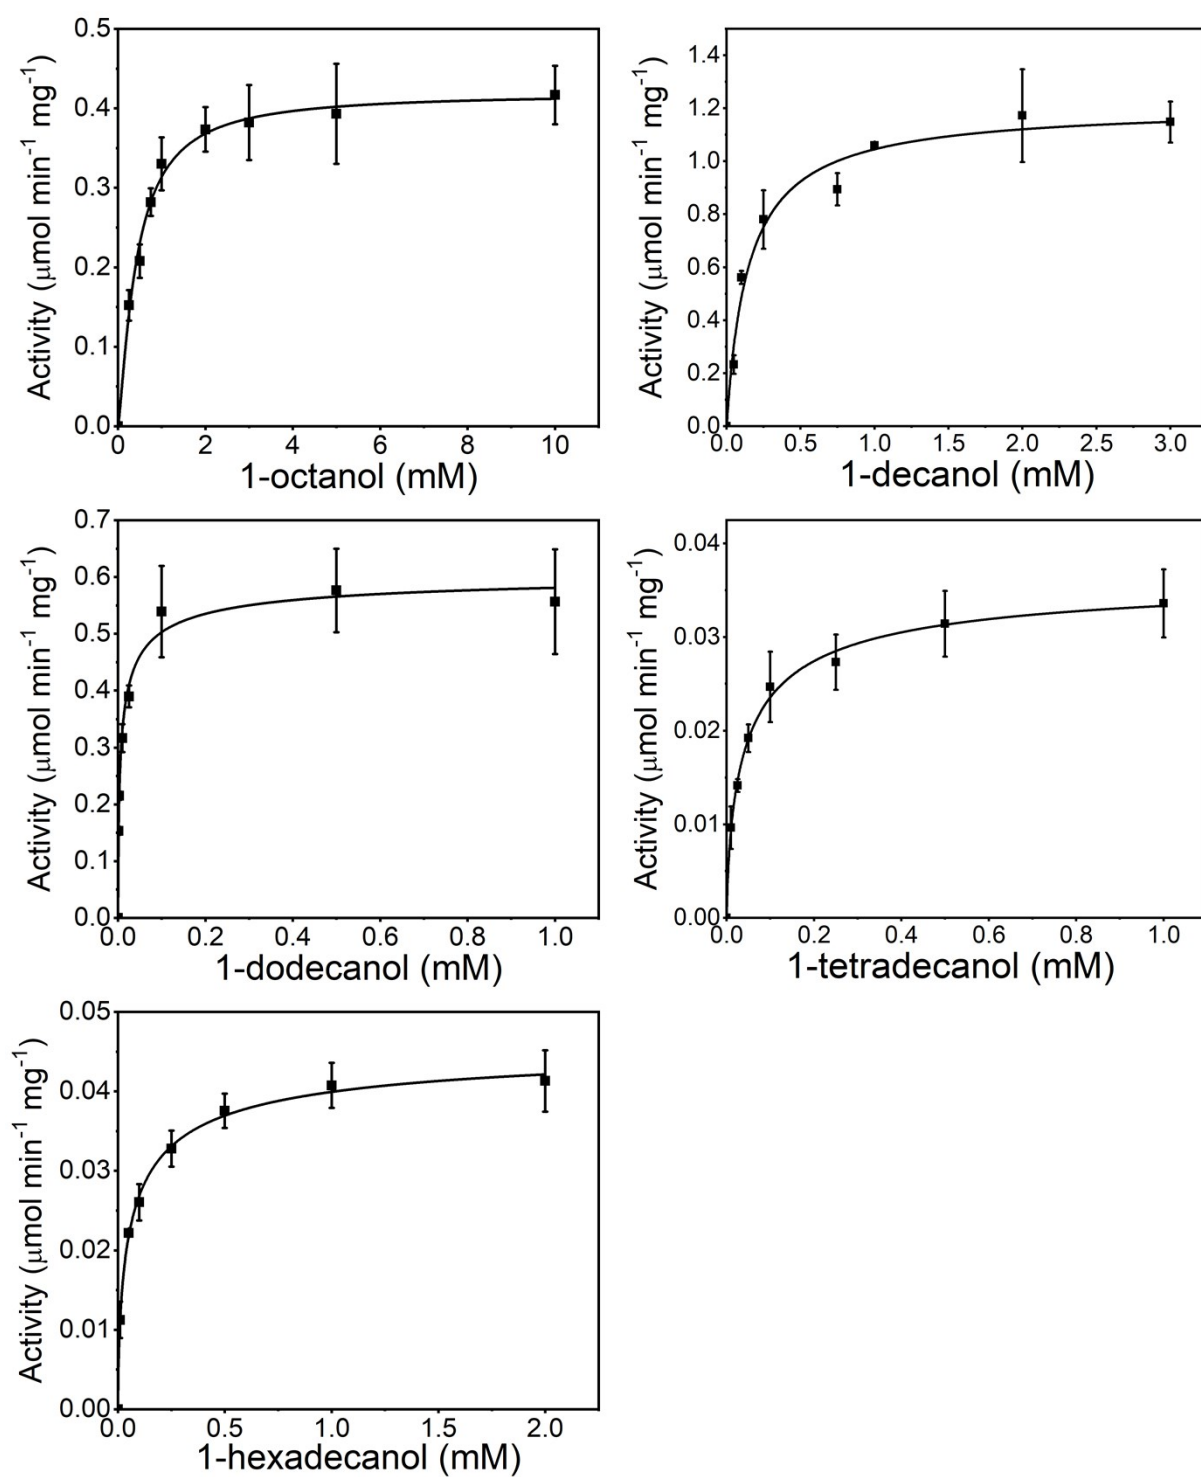

Figure S10. Kinetic characterization of CYP505A30 with primary fatty alcohols

Table S1. Spectral and kinetic parameters of CYP505A30

| Substrate                    | $K_D$ ( $\mu\text{M}$ )             | % HS | $K_D$ HD ( $\mu\text{M}$ )                   | % HS HD | $K_M$ ( $\mu\text{M}$ )          | $k_{\text{cat}}$ ( $\text{s}^{-1}$ ) | $k_{\text{cat}}/K_M$ ( $\mu\text{M}^{-1} \text{s}^{-1}$ ) | $\text{H}_2\text{O}_2$ Uncoupling (%) <sup>c</sup> |
|------------------------------|-------------------------------------|------|----------------------------------------------|---------|----------------------------------|--------------------------------------|-----------------------------------------------------------|----------------------------------------------------|
| <b>Fatty acids</b>           |                                     |      |                                              |         |                                  |                                      |                                                           |                                                    |
| C8 (octanoic acid)           | $16 \pm 1$                          | 35   | $161 \pm 12$                                 | 9       | $3550 \pm 340$                   | $2.5 \pm 0.1$                        | <0.001                                                    | $3.3 \pm 0.3$                                      |
| C10 (decanoic acid)          | $12 \pm 1$<br>( $21.1 \pm 2.0$ )    | 45   | $66 \pm 7$                                   | 18      | $550 \pm 60$                     | $1.5 \pm 0.1$                        | 0.003                                                     | $3.5 \pm 0.4$                                      |
| C12 (dodecanoic acid)        | $3.3 \pm 0.1$<br>( $6.1 \pm 0.4$ )  | 98   | $14 \pm 1$<br>( $9.0 \pm 0.9$ ) <sup>a</sup> | 57      | $26 \pm 3$<br>( $21.2 \pm 2.4$ ) | $2.3 \pm 0.2$                        | 0.09 (0.23)                                               | $1.5 \pm 0.1$                                      |
| C14 (tetradecanoic acid)     | $1.9 \pm 0.2$<br>( $7.4 \pm 0.2$ )  | 100  | $1.5 \pm 0.2$<br>( $3.9 \pm 0.3$ )           | 100     | $13 \pm 1$<br>( $7.7 \pm 1.9$ )  | $2.5 \pm 0.1$                        | 0.19 (0.16)                                               |                                                    |
| C16 (hexadecanoic acid)      | $2.3 \pm 0.1$<br>( $10.5 \pm 0.2$ ) | 83   | $2.7 \pm 0.1$<br>( $1.0 \pm 0.4$ )           | 48      | $6 \pm 1$                        | $1.2 \pm 0.1$                        | 0.2                                                       |                                                    |
| <b>Fatty alcohols</b>        |                                     |      |                                              |         |                                  |                                      |                                                           |                                                    |
| C8 (1-octanol)               | $8.5 \pm 0.7$                       | 65   | $48 \pm 3$                                   | 13      | $450 \pm 50$                     | $0.85 \pm 0.01$                      | 0.002                                                     | $16.3 \pm 0.5$                                     |
| C10 (1-decanol)              | $2.5 \pm 0.2$                       | 60   | $13 \pm 2$                                   | 17      | $150 \pm 12$                     | $2.3 \pm 0.2$                        | 0.015                                                     | $9.5 \pm 0.3$                                      |
| C12 (1-dodecanol)            | $4.9 \pm 0.2$                       | 46   | $4.40 \pm 0.30$                              | 9       | $4.0 \pm 0.2$                    | $1.2 \pm 0.1$                        | 0.3                                                       | $2.8 \pm 0.2$                                      |
| C14 (1-tetradecanol)         | $0.13 \pm 0.02$                     | 59   | $0.10 \pm 0.02$                              | 14      | $33 \pm 2$                       | $0.07 \pm 0.01$                      | 0.002                                                     |                                                    |
| C16 (1-hexadecanol)          | $0.46 \pm 0.03$                     | 78   | $0.50 \pm 0.03$                              | 9       | $45 \pm 3$                       | $0.08 \pm 0.01$                      | 0.002                                                     |                                                    |
| <b>Alkanes</b>               |                                     |      |                                              |         |                                  |                                      |                                                           |                                                    |
| C8 ( <i>n</i> -octane)       | $12 \pm 1$                          | 37   | $18 \pm 2$                                   | 18      |                                  | $0.04 \pm 0.01$ <sup>b</sup>         |                                                           | $3.4 \pm 0.5$                                      |
| C10 ( <i>n</i> -decane)      | $19 \pm 2$                          | 42   | $24 \pm 1$                                   | 13      |                                  | $0.05 \pm 0.01$                      |                                                           | $7.8 \pm 0.1$                                      |
| C12 ( <i>n</i> -dodecane)    | $27 \pm 3$                          | 32   | $44 \pm 3$                                   | 14      |                                  | $0.08 \pm 0.01$                      |                                                           |                                                    |
| C14 ( <i>n</i> -tetradecane) | $20 \pm 1$                          | 60   | $47 \pm 4$                                   | 23      |                                  | $0.07 \pm 0.01$                      |                                                           |                                                    |
| C16 ( <i>n</i> -hexadecane)  | $12 \pm 1$                          | 36   | $35 \pm 4$                                   | 18      |                                  | $0.14 \pm 0.01$                      |                                                           |                                                    |

<sup>a</sup> Values in parenthesis are as reported by Baker and co-workers. <sup>b</sup> Values are for  $k_{\text{obs}}$  at 10 mM. <sup>c</sup>  $\text{H}_2\text{O}_2$  uncoupling was measured as the percentage of NADPH that is used to produce hydrogen peroxide during the reaction.

Table S2. Turnover frequency (TOF) and total turnover number (TTN) for CFE reactions with different substrates

| Substrate              | TOF [min <sup>-1</sup> ] <sup>a</sup> | Conversion (after 2 h) | TTN <sup>b</sup> |
|------------------------|---------------------------------------|------------------------|------------------|
| <b>Octane</b>          | 73.8 ± 4.5                            |                        | 10718 ± 550      |
| <b>Decane</b>          | 8.8 ± 0.4                             |                        | 3125 ± 280       |
| <b>1-octanol</b>       | 42.6 ± 0.1                            | >99 %                  | 2500             |
| <b>2-octanol</b>       | 57.5 ± 6.3                            | >99 %                  | 2500             |
| <b>3-octanol</b>       | 31.1 ± 1.2                            | 83 %                   | 2500             |
| <b>4-octanol</b>       | 18.4 ± 0.9                            | 71 %                   | 2500             |
| <b>1-decanol</b>       | 23.6 ± 3.1                            | >99 %                  | 5000             |
| <b>2-decanol</b>       | 50.2 ± 4.7                            | >99 %                  | 3325 ± 106       |
| <b>1-dodecanol</b>     | 59.2 ± 5.2                            | >99 %                  | 5000             |
| <b>2-dodecanol</b>     | 30.4 ± 6.8                            | 90 %                   | 5000             |
| <b>octanoic acid</b>   | 33.3 ± 0.6                            | 90 %                   | 2500             |
| <b>decanoic acid</b>   | 36.1 ± 5.3                            | >99 %                  | 4200 ± 106       |
| <b>dodecanoic acid</b> | 57.3 ± 0.9                            | 85 %                   | 4850 ± 212       |

<sup>a</sup>TOF calculated for 30 min reactions. For octane reactions, product concentrations were calculated using standards of 2- and 3-octanol for simple alcohols formed, and 1,8-octanediol as standard for diols. For decane reactions, product concentrations were calculated using 2-decanol for *n*-decanol formed, and 1,10-decanediol for diols. For fatty acids and fatty alcohols, the remaining substrate concentration was calculated using their corresponding standards.

<sup>b</sup>TTN achieved over 24 h reactions. For fatty acids and fatty alcohols 10 mM substrate was consumed over 24 h. Alkane TTNs were calculated from the total concentration of product formed after 24 h. [CYP505A30] = 4 μM.

Table S3. GC-FID and GC-MS methods

| Analysis                                                      | Substrates | Derivatization | Temperature program                                             |
|---------------------------------------------------------------|------------|----------------|-----------------------------------------------------------------|
| <b>GC-MS</b>                                                  |            |                |                                                                 |
| <b>Column A: FactorFour CF-5ms (60 m x 0.25 mm x 0.25 μm)</b> |            |                |                                                                 |
| Alkanes                                                       | C8 – C10   | BSTFA          | 100 °C hold 0 min → 300 °C (10 min <sup>-1</sup> ) hold 10 min  |
| Fatty alcohols                                                | C8 – C12   |                |                                                                 |
| Fatty acids                                                   | C8 – C12   |                |                                                                 |
| <b>GC-FID</b>                                                 |            |                |                                                                 |
| <b>Column B: BPX90 (30 m x 0.25 mm x 0.25 μm)</b>             |            |                |                                                                 |
| Alkanes                                                       | C8 – C10   | None           | 80 °C hold 2 min → 280 °C (15 min <sup>-1</sup> ) hold 4.66 min |
| Fatty alcohols                                                | C8 – C12   | None           |                                                                 |
| Fatty acids                                                   | C8 – C12   | TMSH           |                                                                 |

**Substrate:** octanoic acid**Derivatization:** TMSH**Column:** B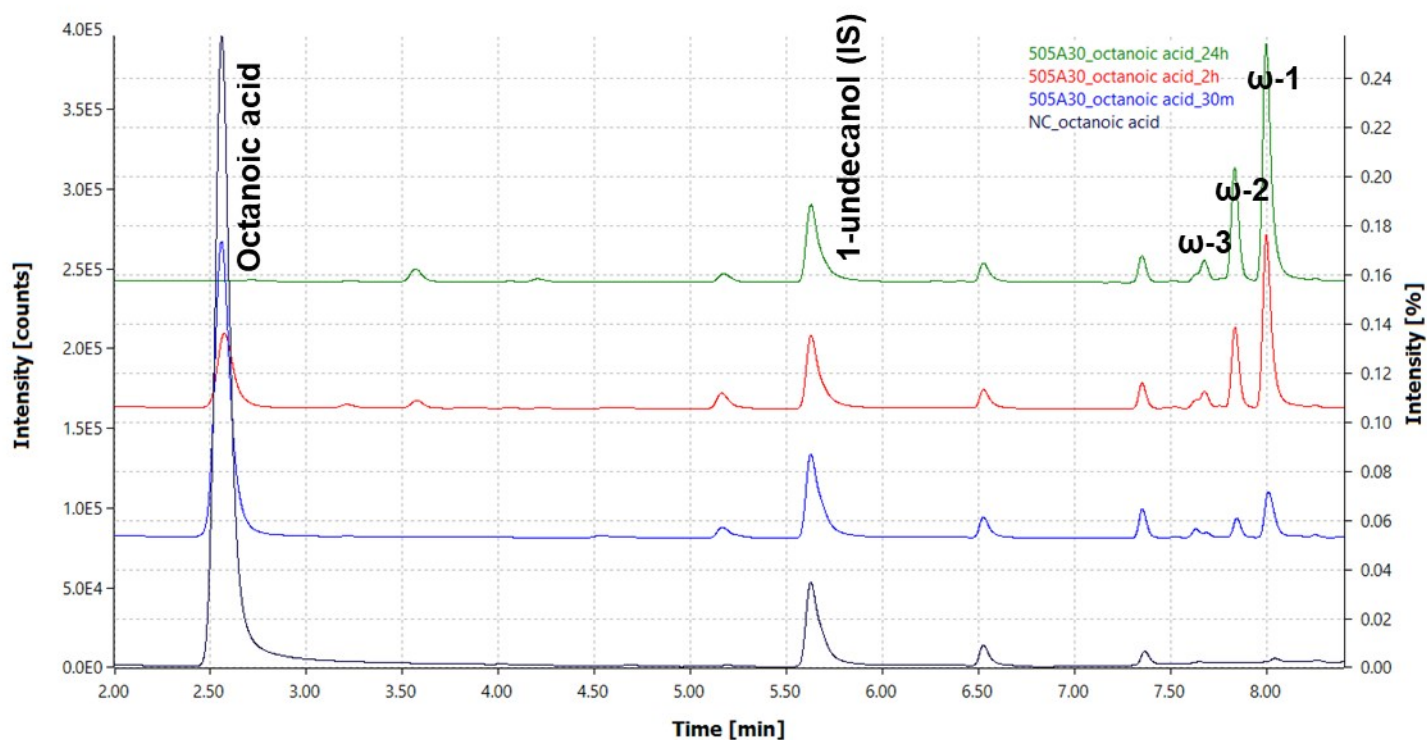**Substrate:** octanoic acid**Derivatization:** BSTFA**Column:** A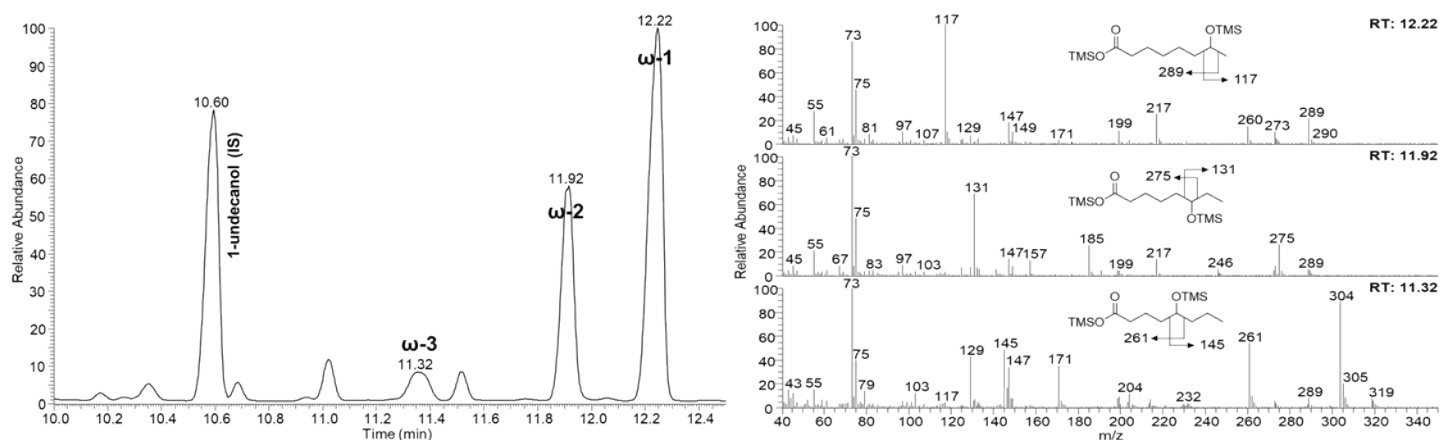

Figure S11. GC chromatograms for reactions with fatty acids (C8 - C12) after 30 min, 2 h, and 24 h of CFE biotransformations. Negative control (NC) are 24 h biotransformations with CFE carrying the empty plasmid. GC/MS chromatogram and spectra of the hydroxy-fatty acids formed after 24 h reactions with CFE, unless otherwise is stated.

**Substrate:** decanoic acid      **Derivatization:** TMSH      **Column:** B

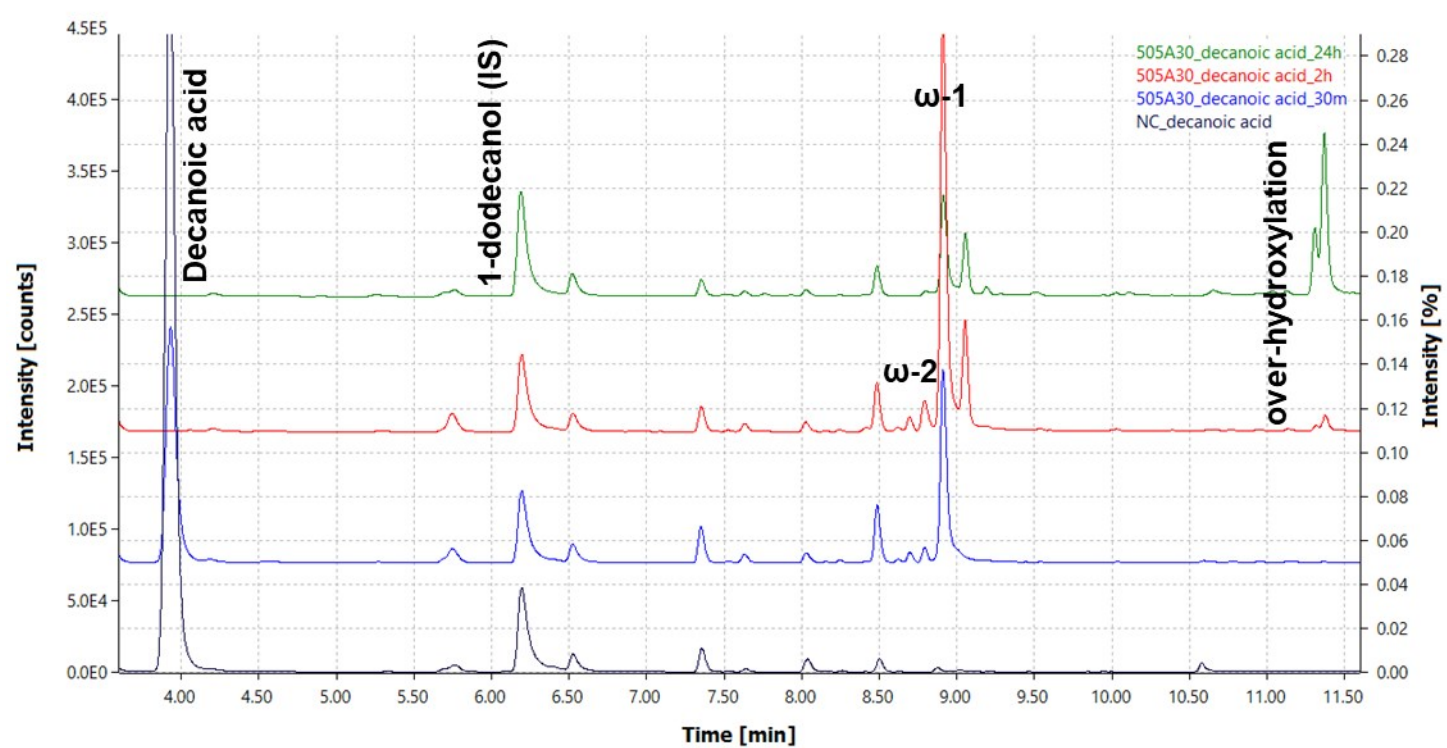

**Substrate:** decanoic acid      **Derivatization:** BSTFA      **Column:** A

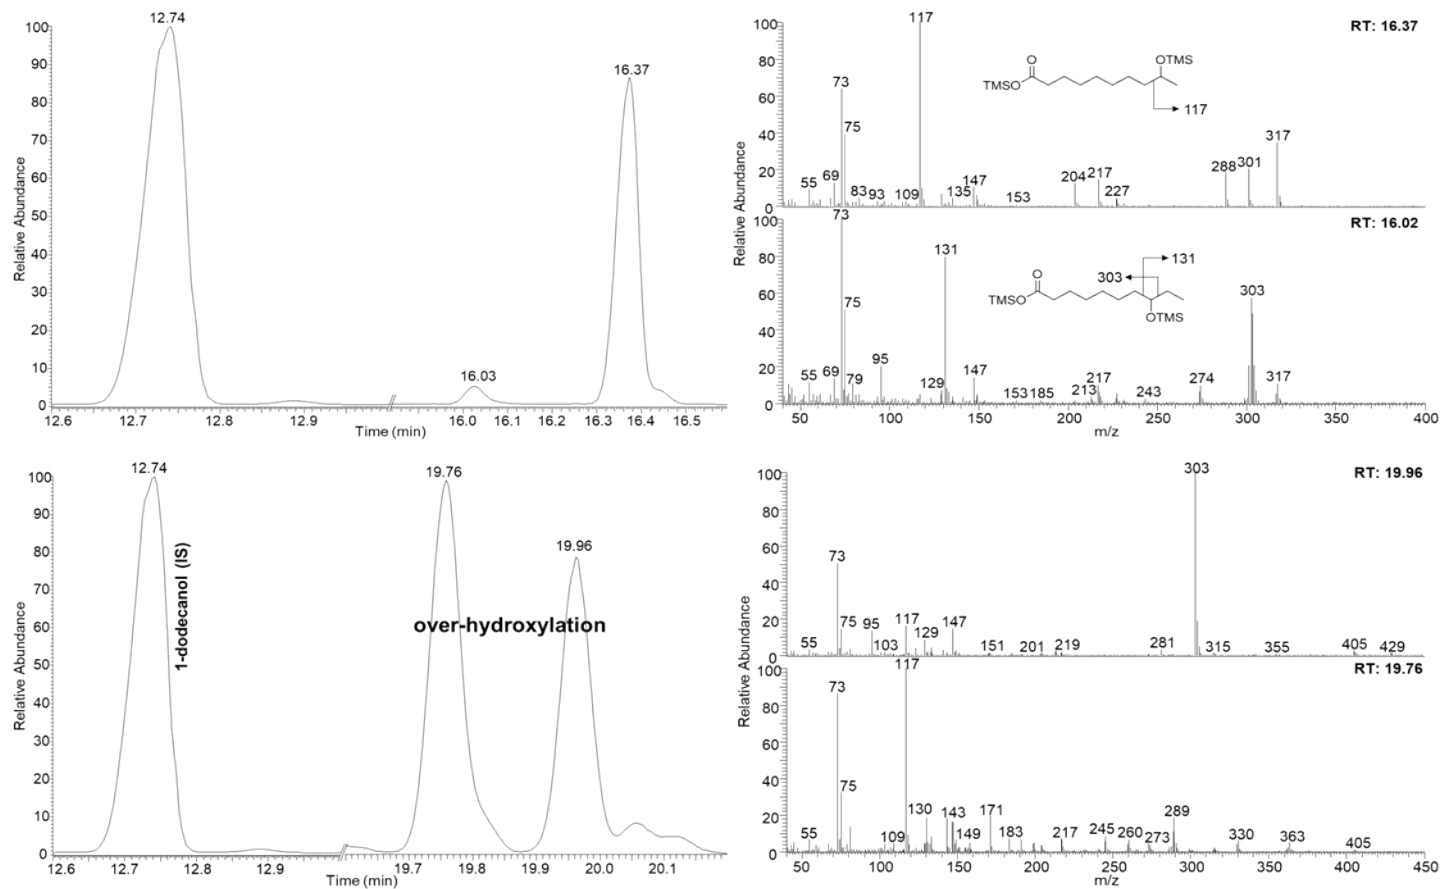

Figure S11. Cont.



**Substrate:** dodecanoic acid**Derivatization:** TMSH**Column:** B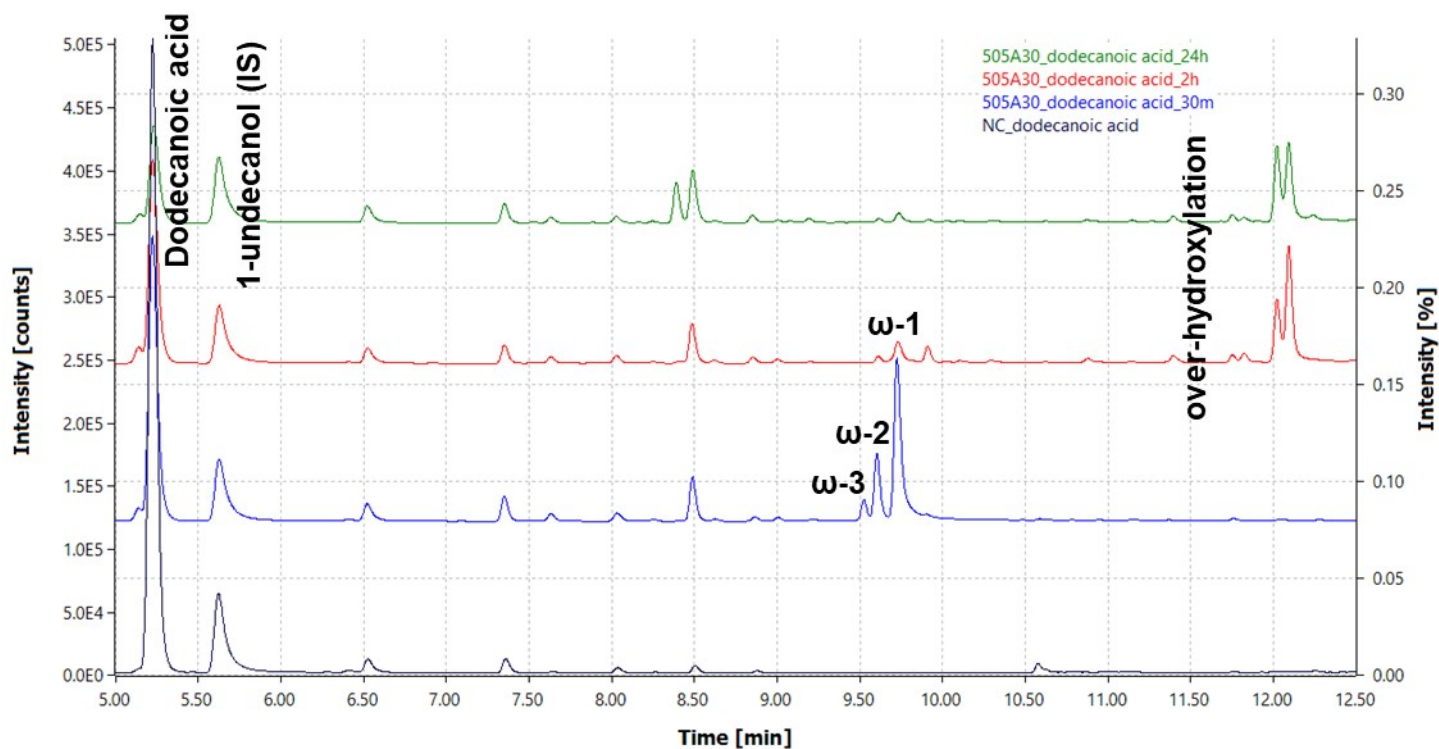**Substrate:** dodecanoic acid**Derivatization:** BSTFA**Column:** A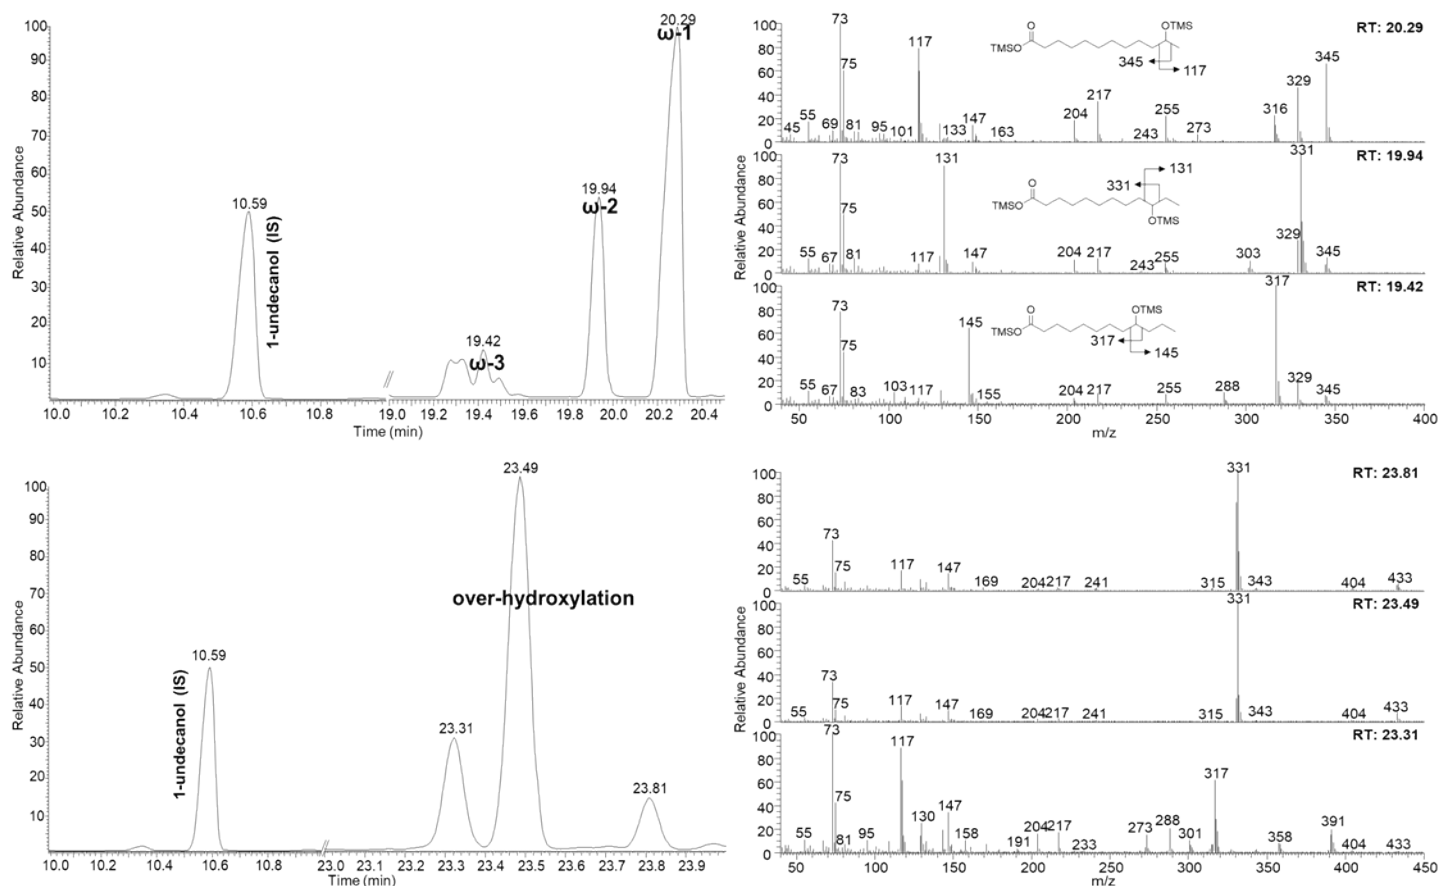

Figure S11. Cont. GC/MS chromatogram and spectra of production of hydroxy dodecanoic acid ( $\omega$ -1,  $\omega$ -2, and  $\omega$ -3) after 30 min reactions with CFE. GC/MS chromatogram and spectra of over-hydroxylation of the substrate after 24 h reaction with CFE.

**Substrate:** 1-octanol      **Derivatization:** none      **Column:** B

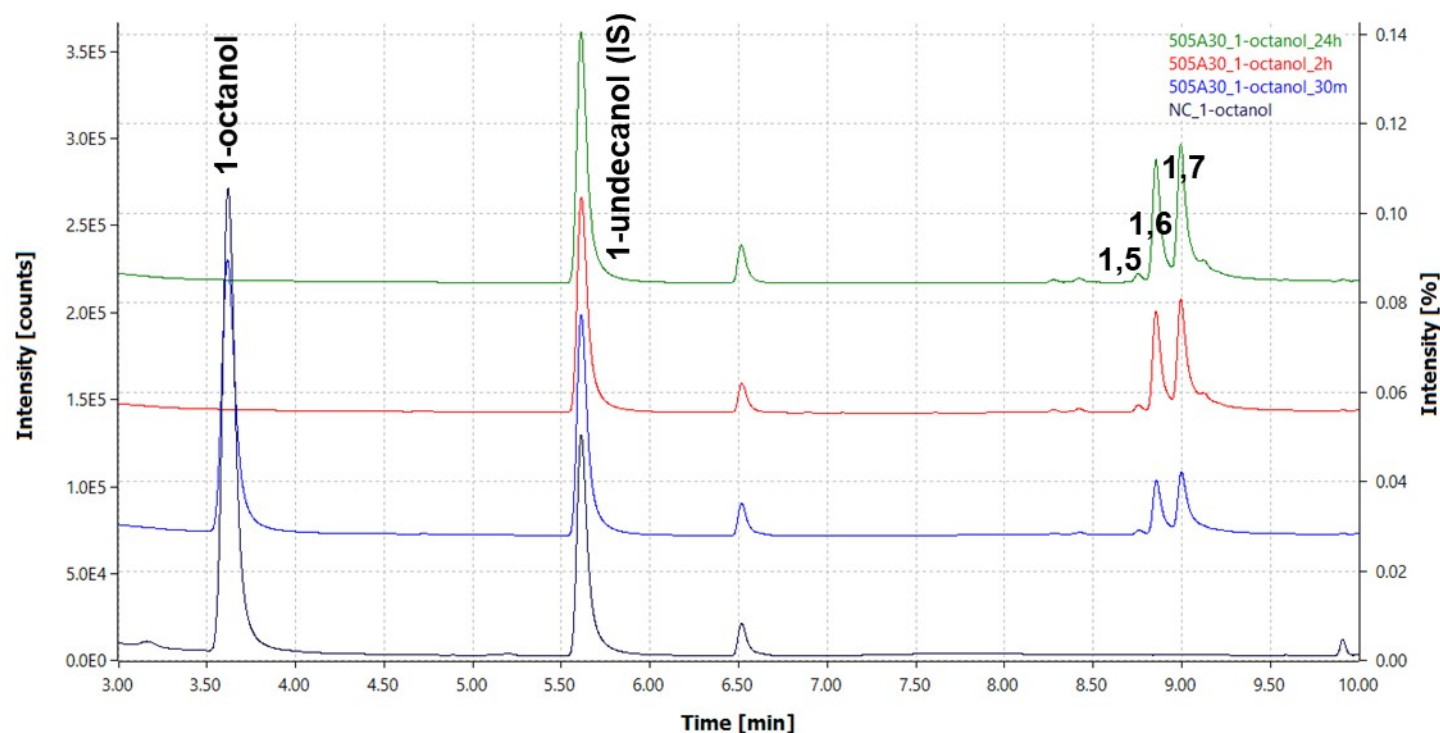

**Substrate:** 1-octanol      **Derivatization:** BSTFA      **Column:** A

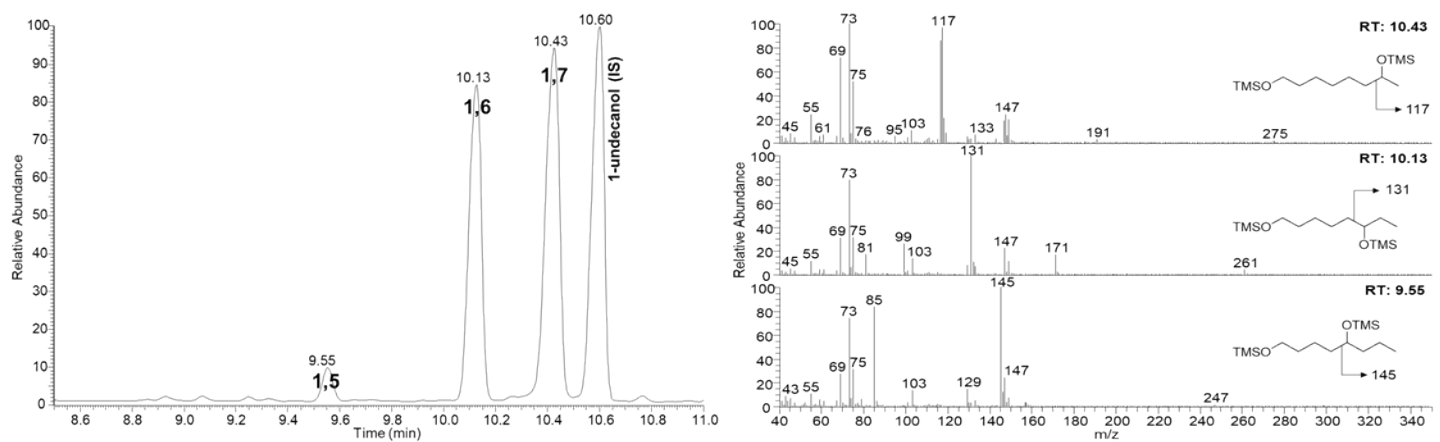

Figure S12. GC chromatograms for reactions with primary fatty alcohols (C8 - C12) after 30 min, 2 h, and 24 h of CFE biotransformations. Negative control (NC) are 24 h biotransformations with CFE carrying the empty plasmid. GC/MS chromatogram and spectra of the diols (and triols) formed after 24 h reactions with CFE, unless otherwise is stated.

|                             |                             |                  |
|-----------------------------|-----------------------------|------------------|
| <b>Substrate:</b> 1-decanol | <b>Derivatization:</b> none | <b>Column:</b> B |
|-----------------------------|-----------------------------|------------------|

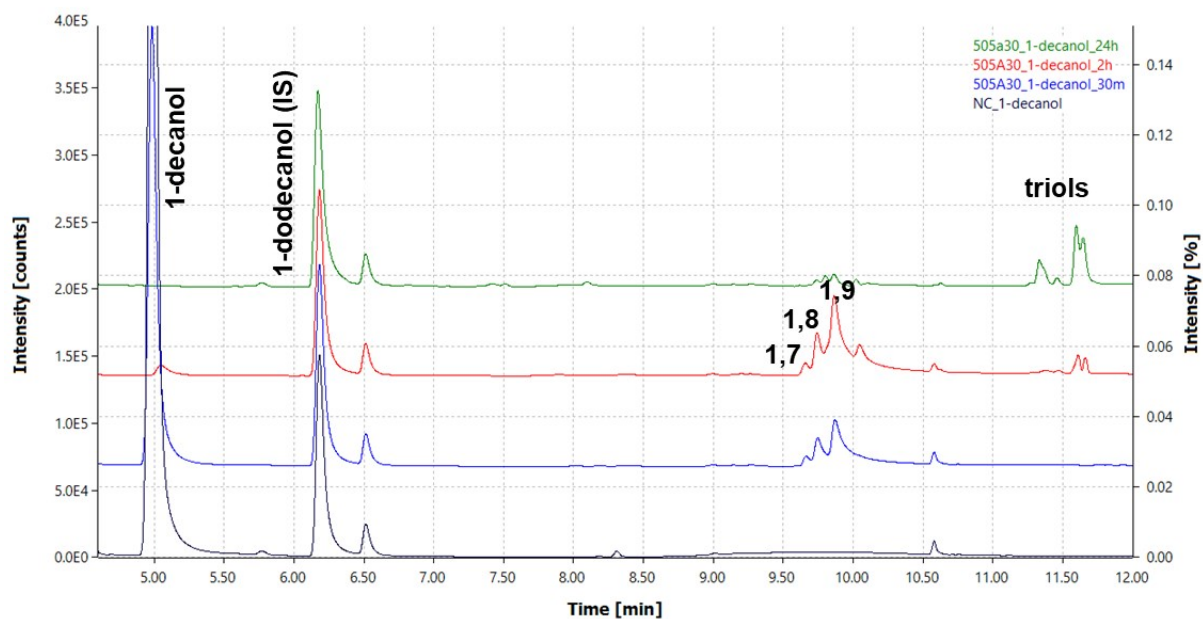

|                             |                              |                  |
|-----------------------------|------------------------------|------------------|
| <b>Substrate:</b> 1-decanol | <b>Derivatization:</b> BSTFA | <b>Column:</b> A |
|-----------------------------|------------------------------|------------------|

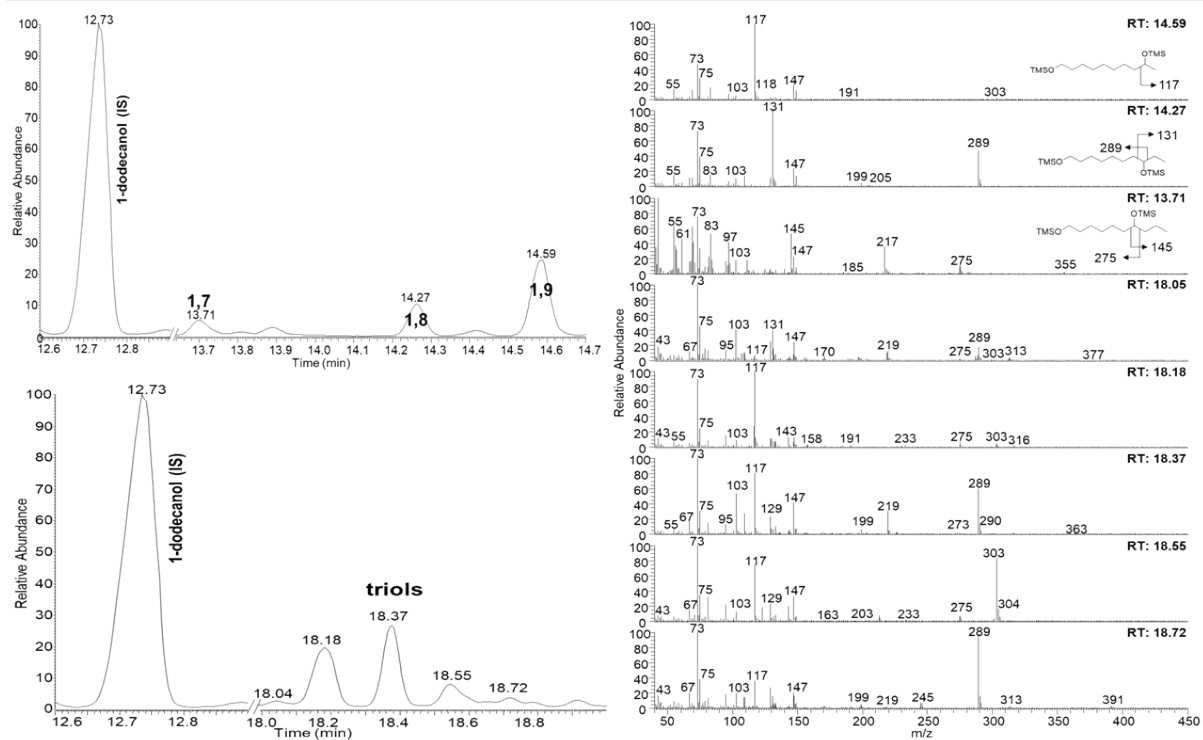

Figure S12. Cont.

**Substrate: 1-dodecanol****Derivatization: none****Column: B**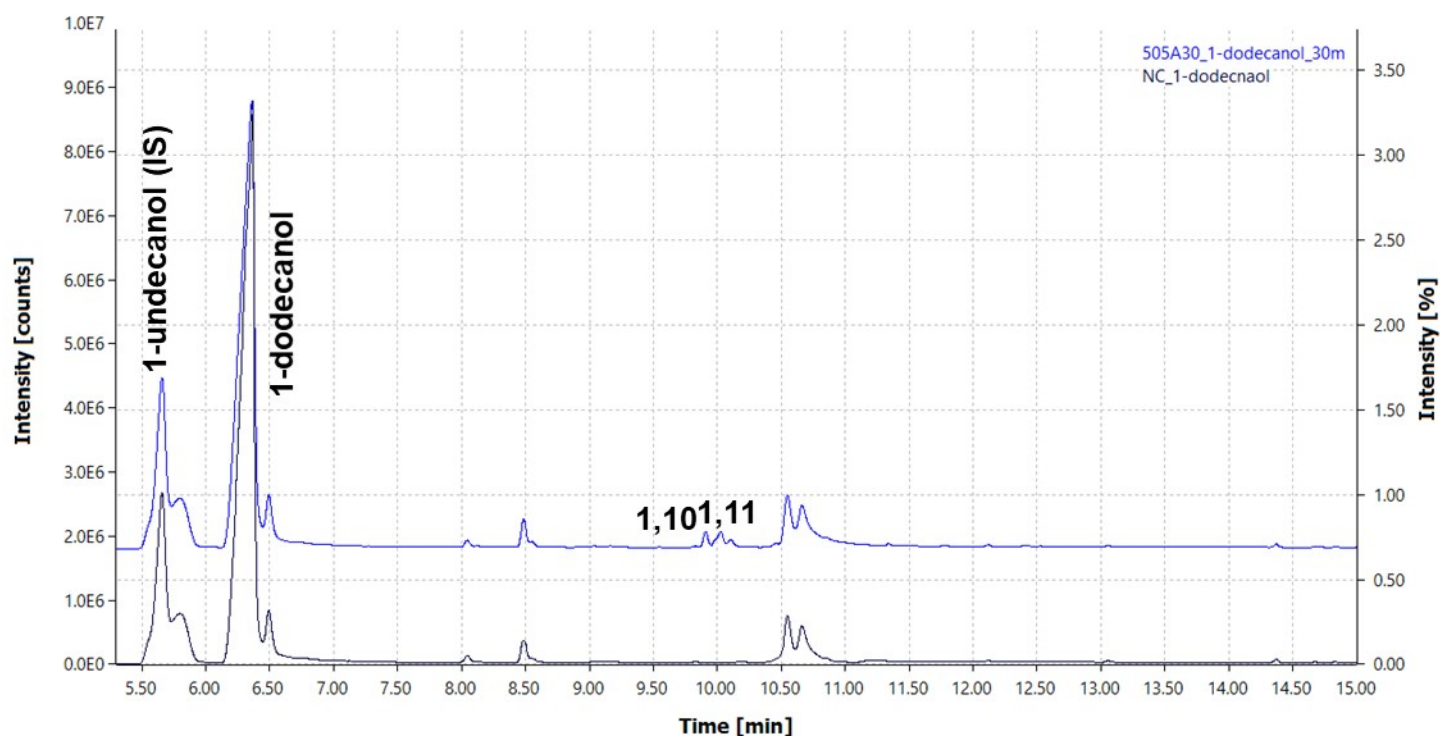**Substrate: 1-dodecanol****Derivatization: BSTFA****Column: A**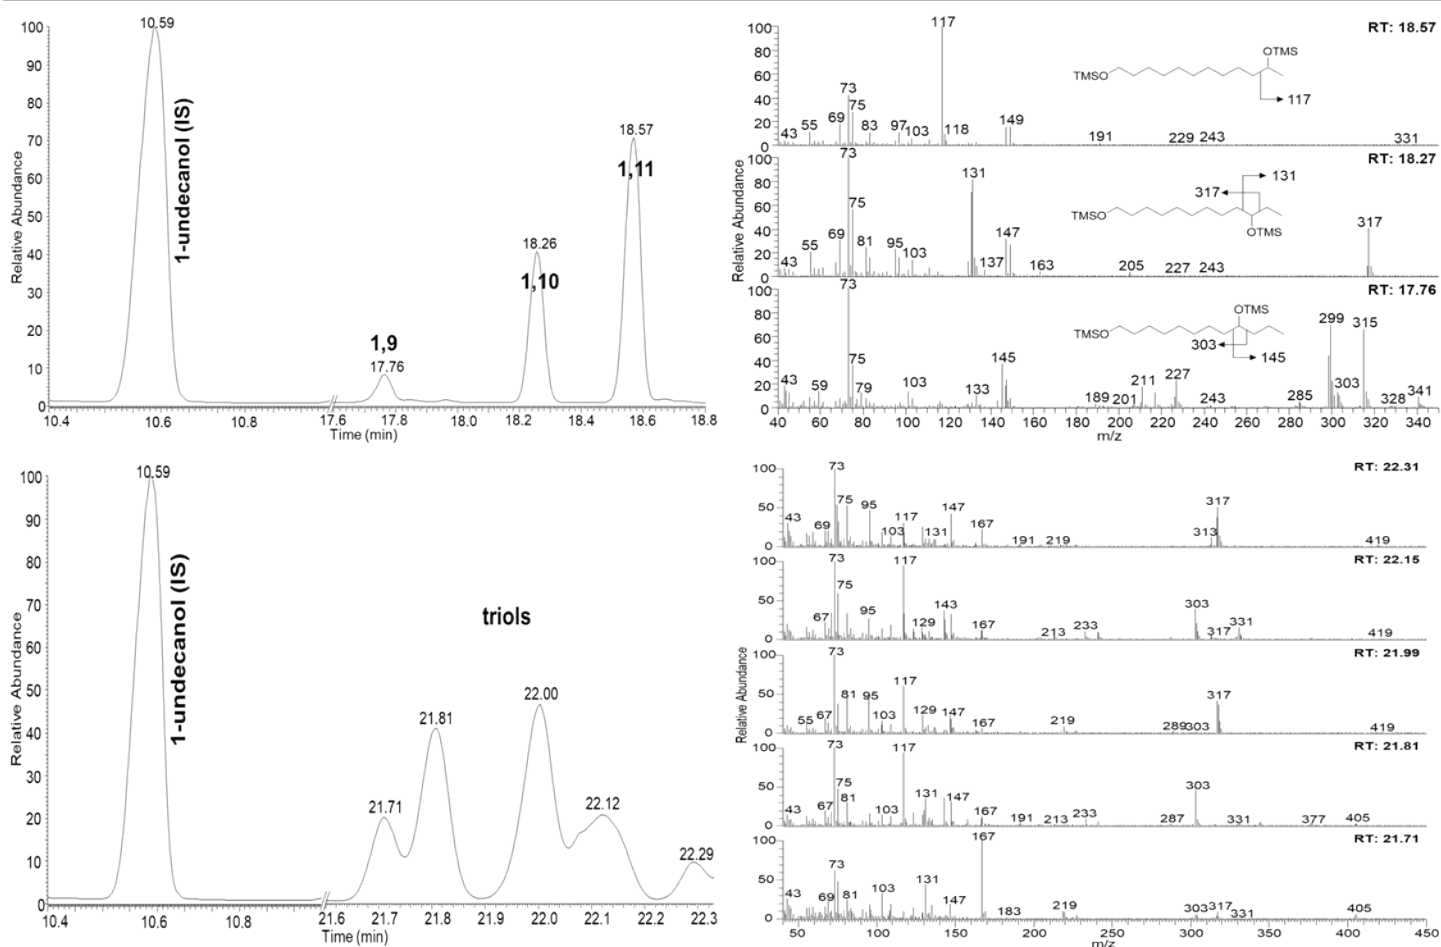

Figure S12. Cont. GC chromatograms for reactions with 1-dodecanol after 30 min CFE biotransformations. Negative control (NC) 24 h biotransformations with CFE carrying the empty



plasmid. GC/MS chromatogram and spectra of the diols (and triols) formed after 2 h reactions with CFE.

**Substrate:** *n*-octanol      **Derivatization:** none      **Column:** B

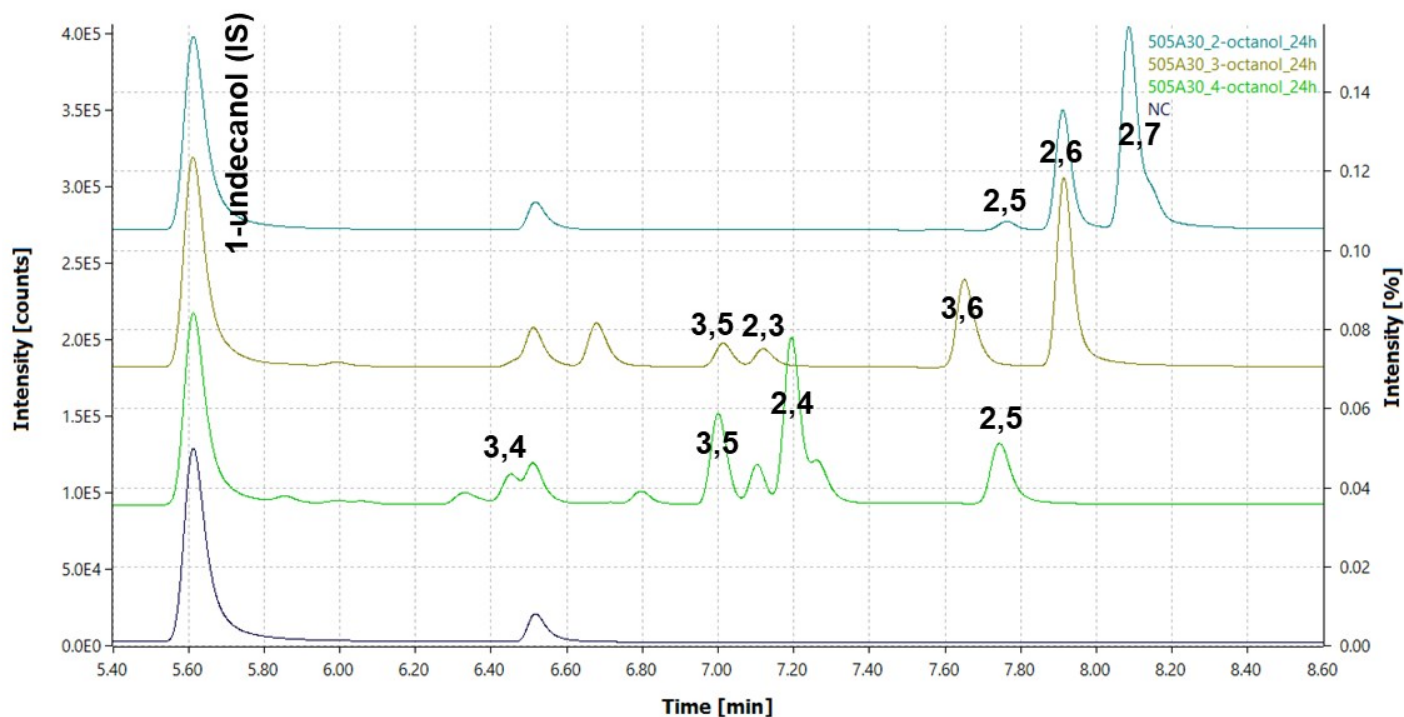

**Substrate:** *n*-octanol      **Derivatization:** BSTFA      **Column:** A

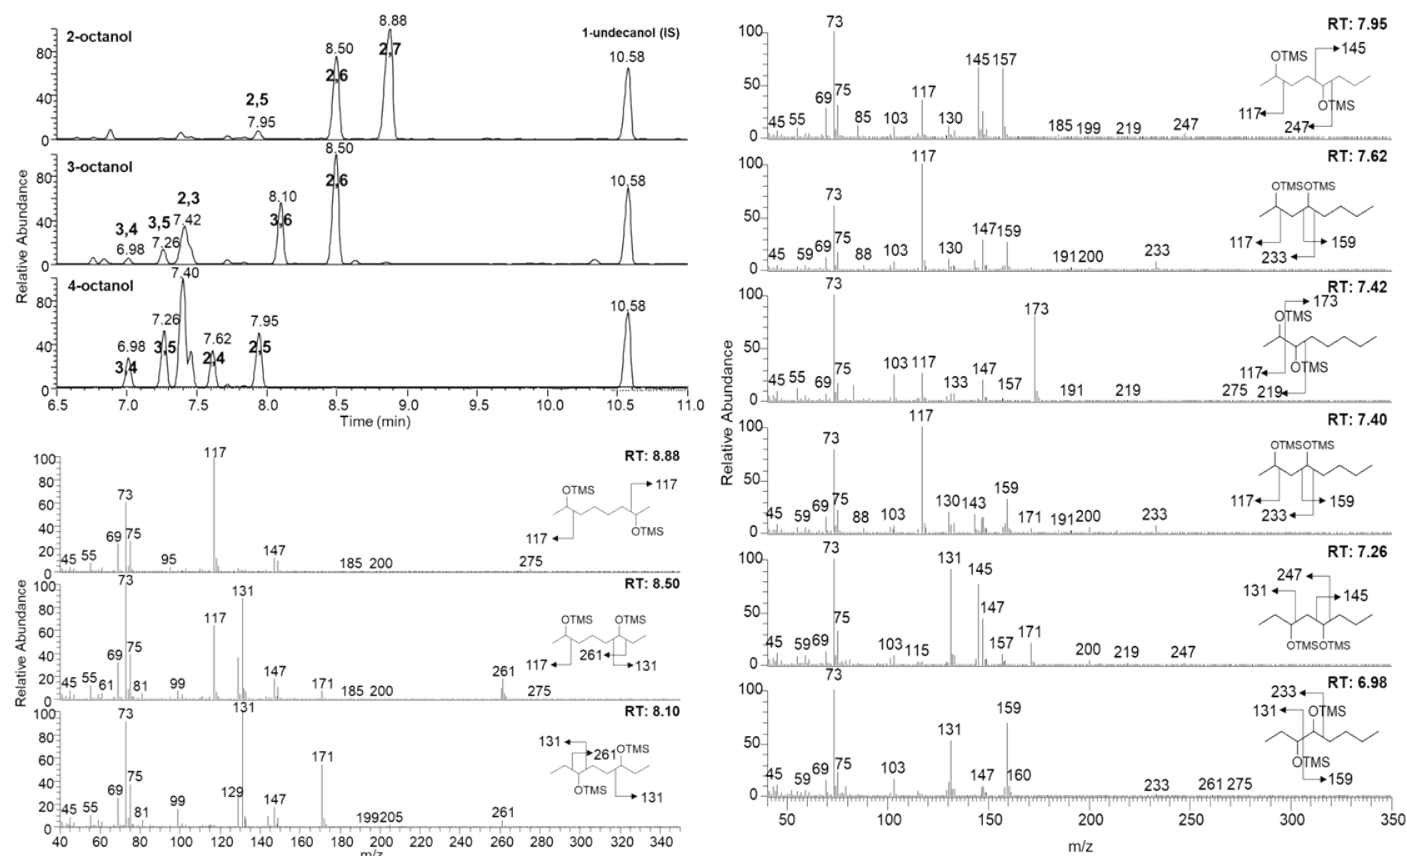

Figure S13. GC chromatograms for reactions with 2-, 3-, and 4-octanol after 24 h of CFE biotransformations. Negative control (NC) are 24 h biotransformations with CFE carrying the empty plasmid. GC/MS chromatogram and spectra of the diols formed after 24 h reactions with CFE.

**Substrate: 2-decanol****Derivatization: none****Column: B**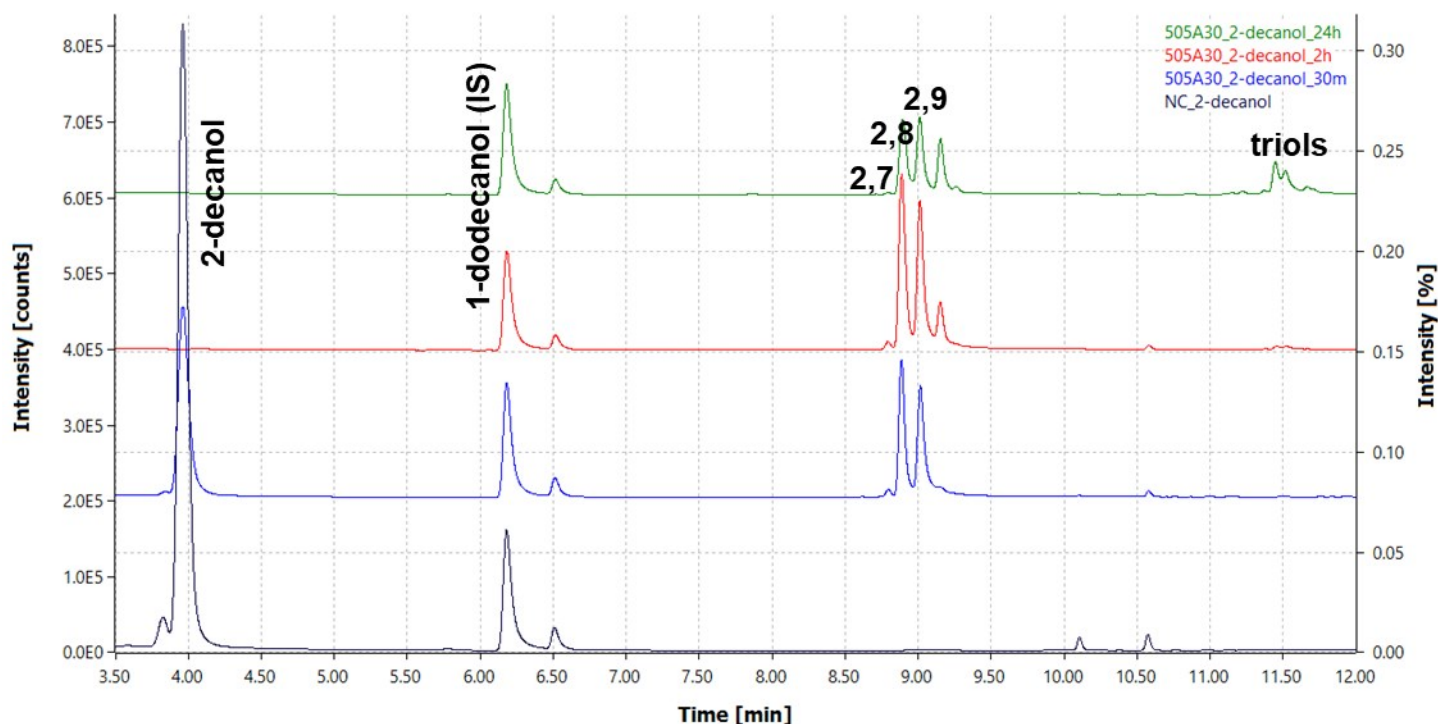**Substrate: 2-decanol****Derivatization: BSTFA****Column: A**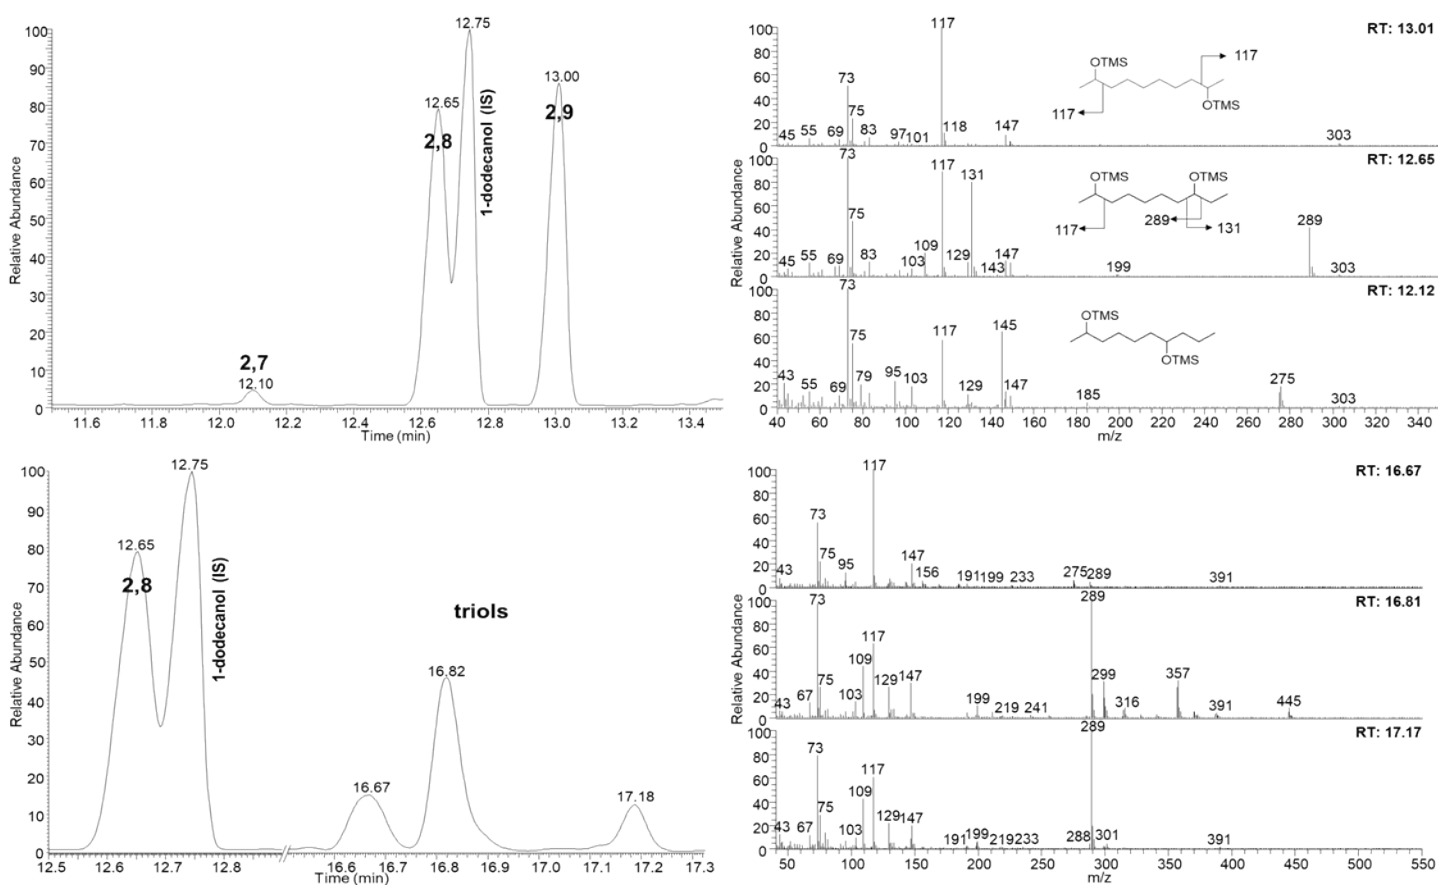

Figure S14. GC chromatograms for reactions with secondary fatty alcohols (C10 and C12) after 30 min, 2 h, and 24 h of CFE biotransformations. Negative control (NC) are 24 h biotransformations with CFE carrying the empty plasmid. GC/MS chromatogram and spectra of the diols (and triols) formed after 24 h reactions with CFE.



**Substrate: 2-dodecanol****Derivatization: none****Column: B**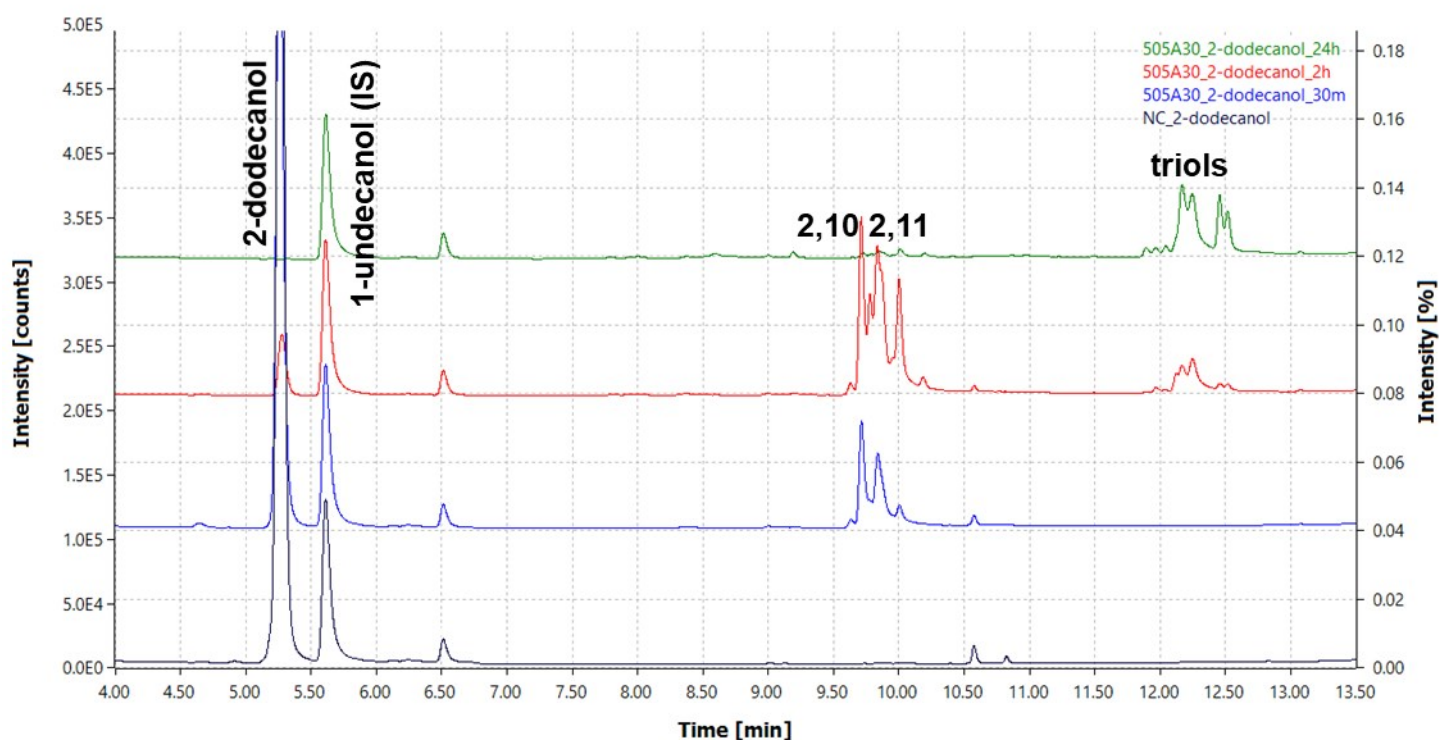**Substrate: 2-dodecanol****Derivatization: BSTFA****Column: A**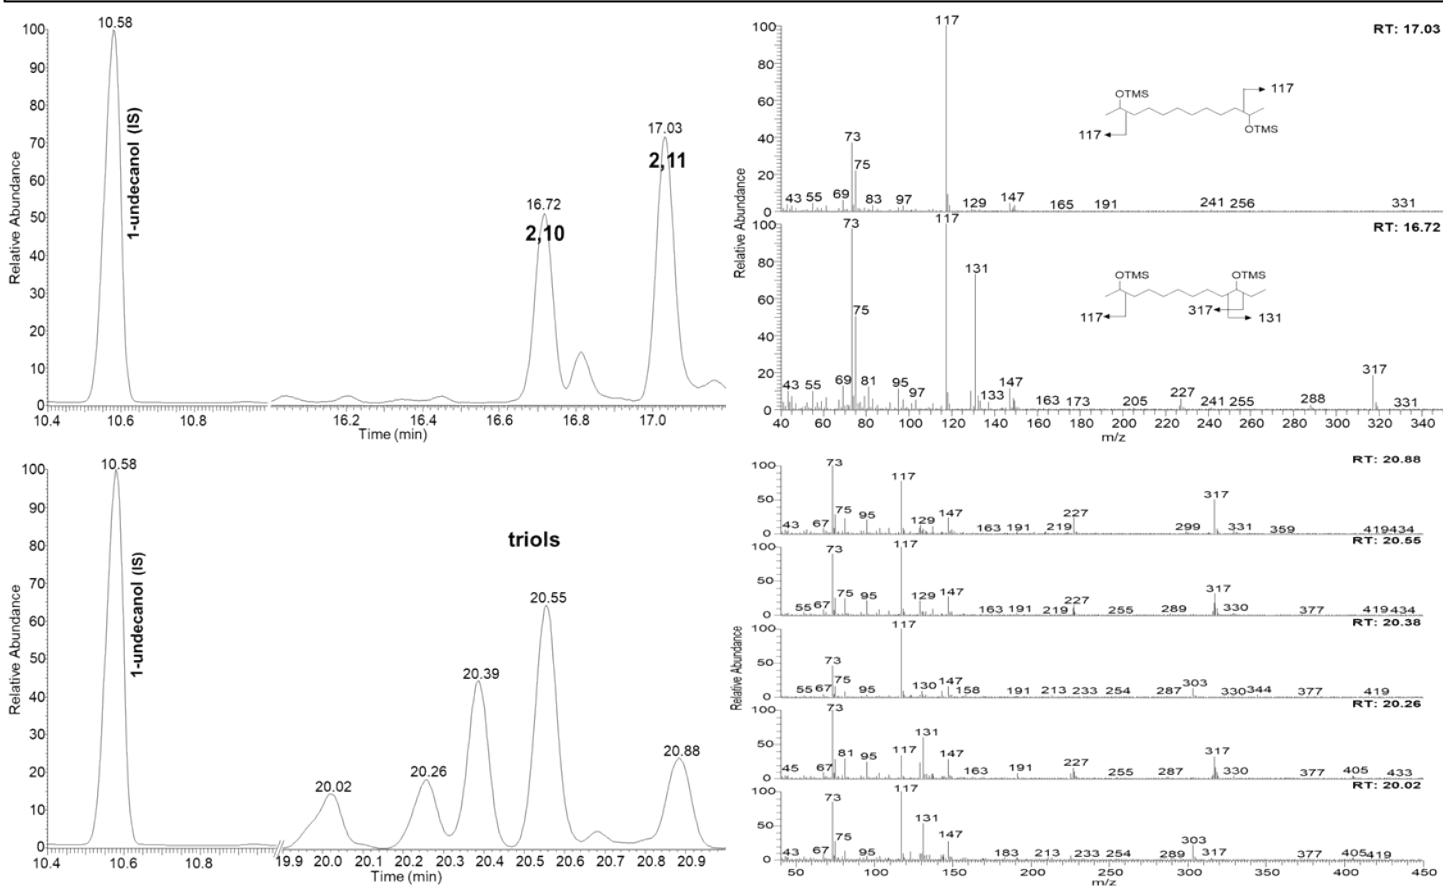

Figure S14. Cont. GC/MS chromatogram and spectra of diols and triols after 2 h reactions with CFE.

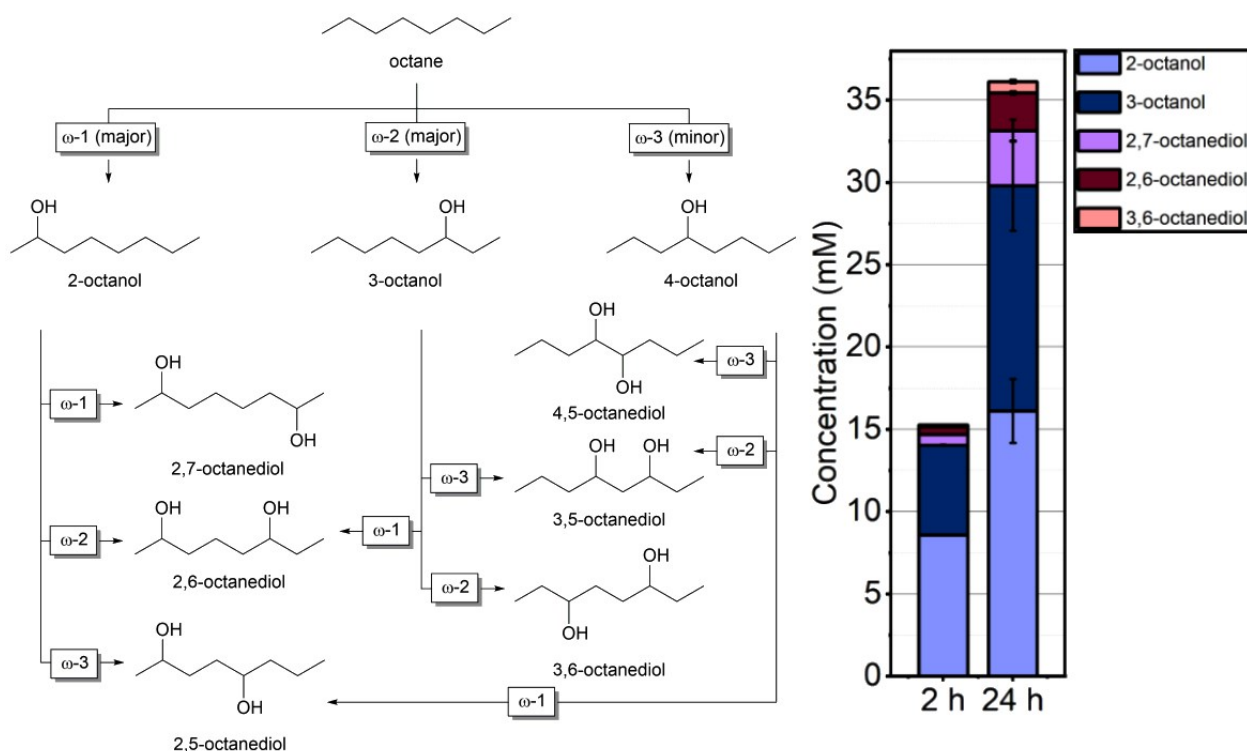

Scheme S1. Sequential regioselective oxyfunctionalization of *n*-octane by CYP505A30 in the production of diols. Total products formed (mM) after 2 h and 24 h reactions with CFE. The concentration of *n*-octanols were calculated using their respective standards. For octanediols, concentrations were calculated using 1,8-octanediol as standard.

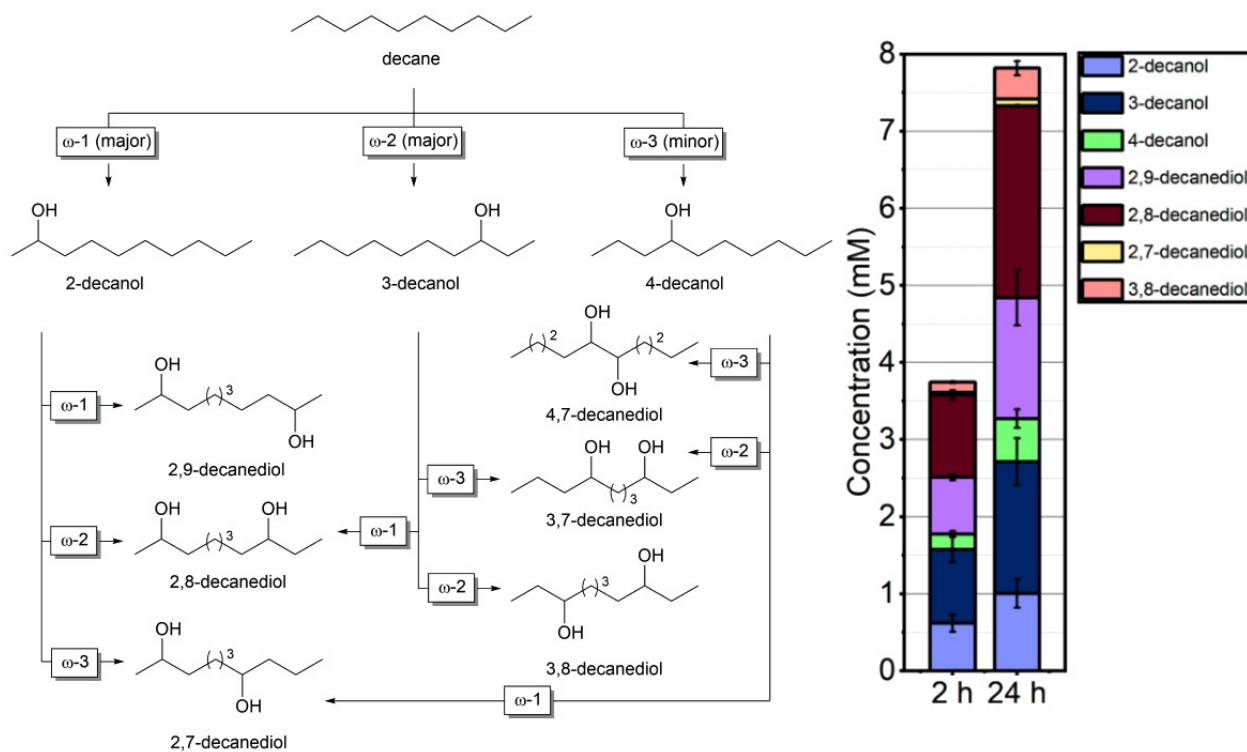

Scheme S2. Sequential regioselective oxyfunctionalization of *n*-decane by CYP505A30 in the production of diols. Total products formed (mM) after 2 h and 24 h reactions with CFE. The concentration of *n*-decanols were calculated using 2-decanol as standards and 1,10-decanediol as standard for decanediols. [CYP505A30] = 4  $\mu$ M.

|                          |                             |                  |
|--------------------------|-----------------------------|------------------|
| <b>Substrate:</b> octane | <b>Derivatization:</b> none | <b>Column:</b> B |
|--------------------------|-----------------------------|------------------|

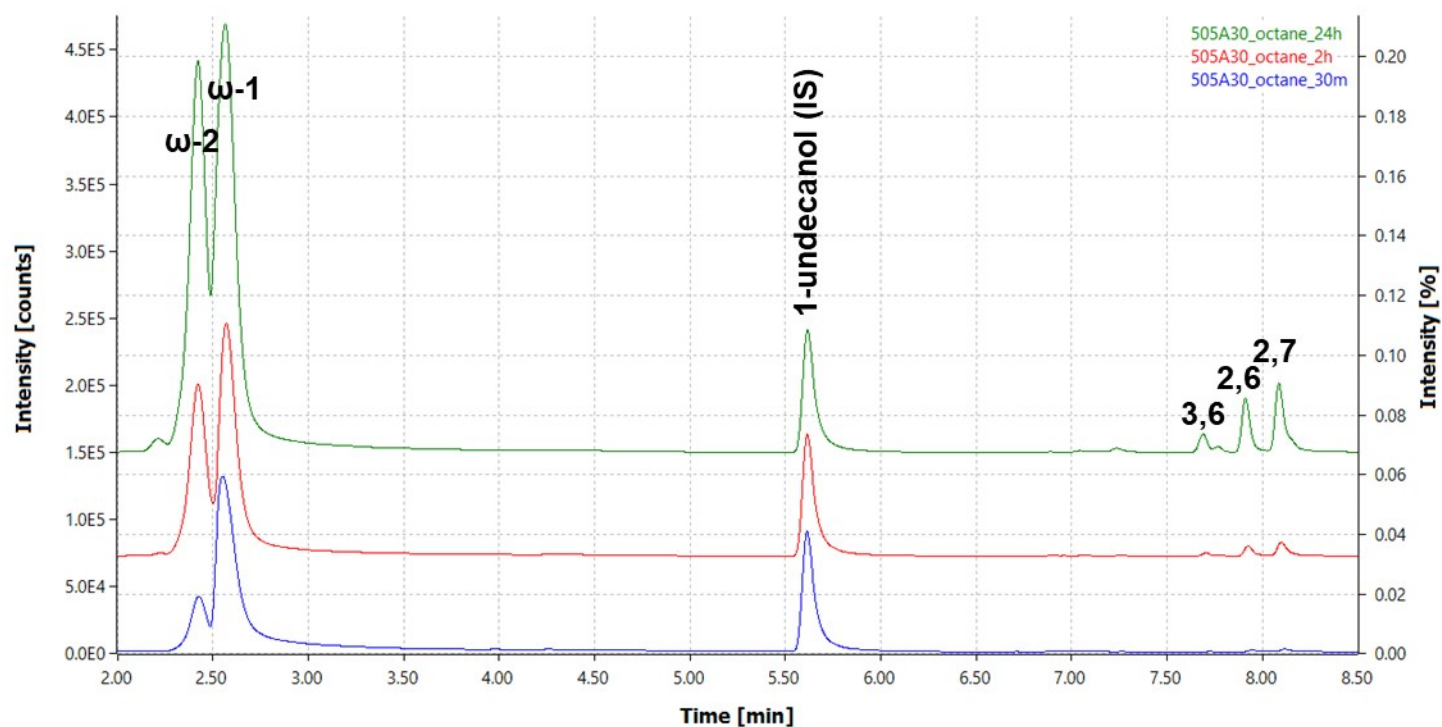

|                          |                              |                  |
|--------------------------|------------------------------|------------------|
| <b>Substrate:</b> octane | <b>Derivatization:</b> BSTFA | <b>Column:</b> A |
|--------------------------|------------------------------|------------------|

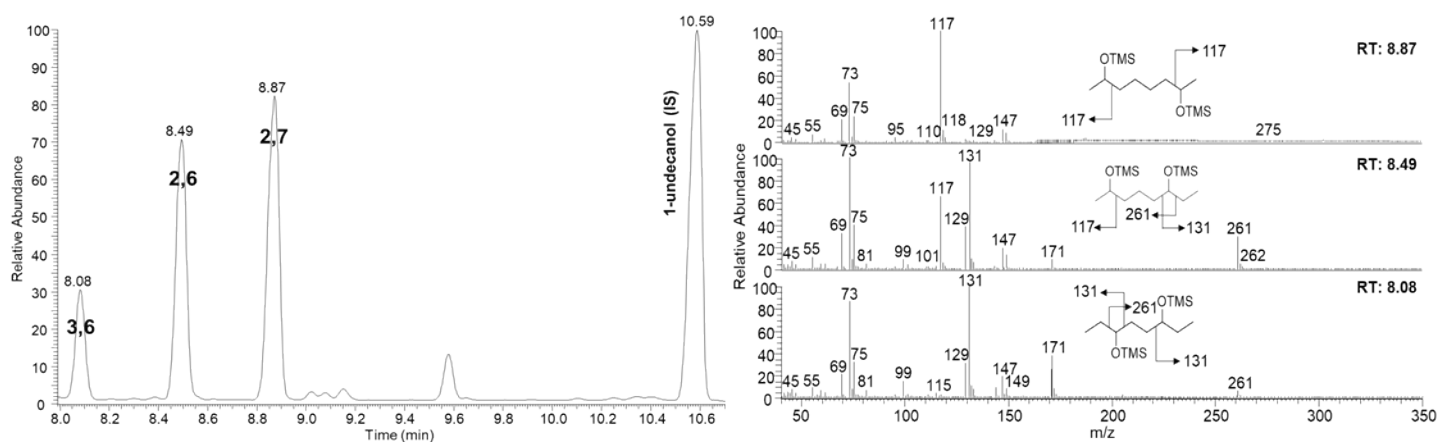

Figure S15. GC chromatograms for reactions with *n*-alkanes (C8 and C10) at 30 min, 2 h, and 24 h of CFE biotransformations. GC/MS chromatogram and spectra of the diols formed after 24 h CFE biotransformations.

Substrate: decane

Derivatization: none

Column: B

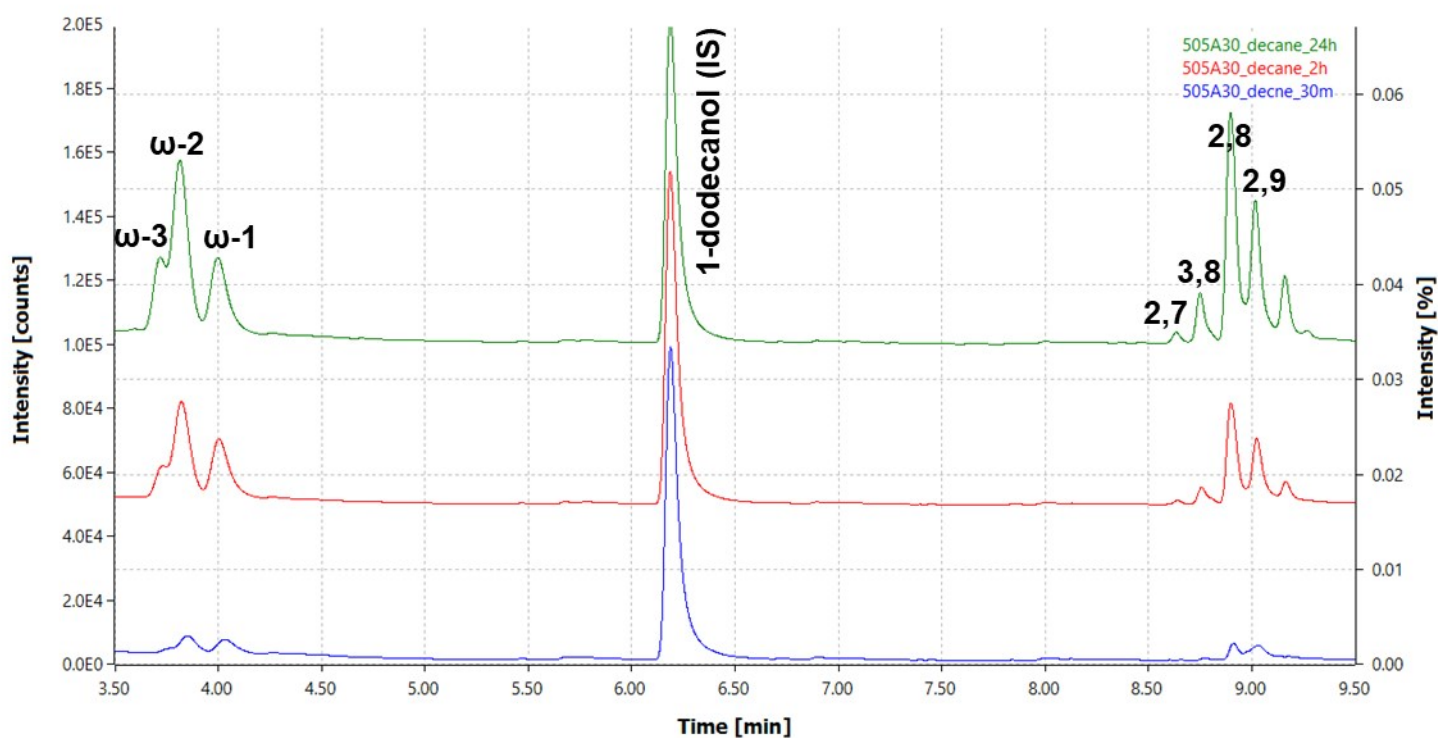

Substrate: decane

Derivatization: BSTFA

Column: A

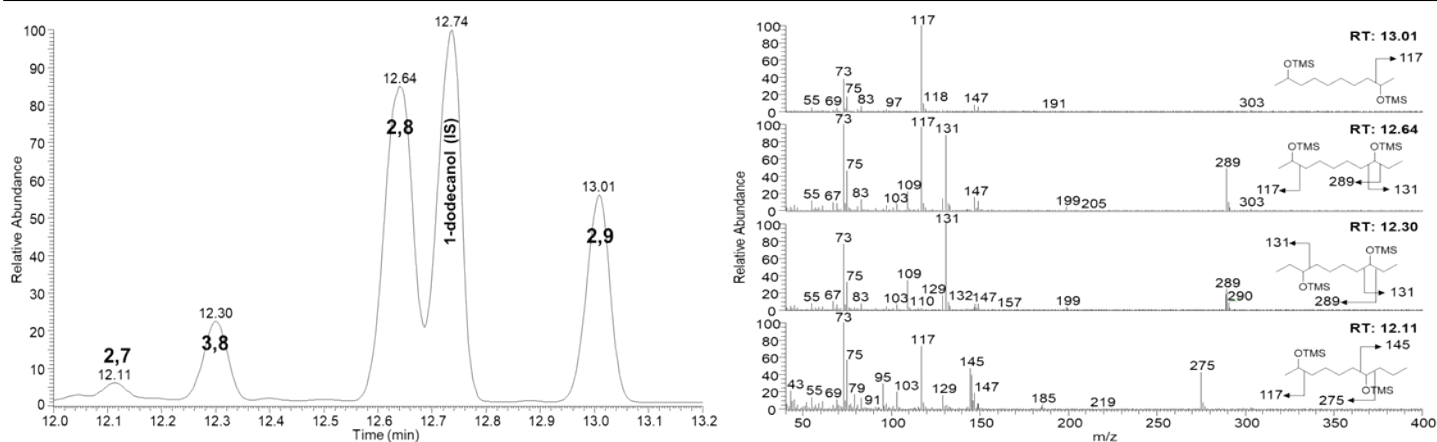

Figure S15. Cont.
